# 1 Boundary stacking interactions enable cross-TAD 2 enhancer-promoter communication during limb 3 development

4  
5 **Authors:** Tzu-Chiao Hung<sup>1</sup>, David M. Kingsley<sup>1,2</sup>, Alistair Boettiger<sup>1,\*</sup>

6 <sup>1</sup> Department of Developmental Biology, Stanford University School of Medicine, Stanford CA

7 <sup>2</sup> Howard Hughes Medical Institute, Stanford University School of Medicine, Stanford CA

8 \*correspondence: [boettiger@stanford.edu](mailto:boettiger@stanford.edu)

9

## 10 **Abstract**

11 While long-range enhancers and their target promoters are frequently contained within a TAD,  
12 many developmentally important genes have their promoter and enhancers within different TADs.  
13 Hypotheses about molecular mechanisms enabling such cross-TAD interactions remain to be  
14 assessed. To test these hypotheses, we use Optical Reconstruction of Chromatin Architecture  
15 (ORCA) to characterize the conformations of the *Pitx1* locus on thousands of single chromosomes  
16 in developing mouse limbs. Our data supports a model in which neighboring boundaries are  
17 stacked with each other as a result of loop-extrusion, bringing boundary-proximal *cis*-elements  
18 into contact. This stacking interaction also explains the appearance of architectural stripes in the  
19 population average maps (e.g. Hi-C data). Through molecular dynamics simulations, we further  
20 propose that increasing boundary strengths facilitates the formation of the stacked boundary  
21 conformation, counter-intuitively facilitating border bypass. This work provides a revised view of  
22 the TAD borders' function, both facilitating as well as preventing *cis*-regulatory interactions, and  
23 introduces a framework to distinguish border-crossing from border-respecting enhancer-promoter  
24 pairs.

## 25 Introduction

26

27 The mammalian genome is partitioned in its 3D organization into topologically associating  
28 domains (TADs), regions in which intra-domain interactions are substantially more common than  
29 interdomain interactions<sup>1-4</sup>. Known long range *cis*-regulatory interactions, most notably between  
30 enhancers and their target promoters, frequently lie within the same TAD, and in a multitude of  
31 cases mutations which disrupt this TAD organization result in corresponding disruptions to normal  
32 enhancer promoter contact and changes in gene expression<sup>5-9</sup>.

33

34 Nonetheless, several developmentally important enhancers are separated by TAD borders and  
35 CTCF bound insulators from the genes they control. These include genes with key roles in axial  
36 patterning<sup>10</sup>, hematopoiesis<sup>11</sup> and limb patterning<sup>12,13</sup>. As candidate enhancer-promoter (E-P)  
37 interactions are frequently hypothesized and tested based on linear proximity to a gene, guided  
38 by previously mapped TAD boundaries, and studied in cell culture, it is likely that the genome-  
39 wide frequency of TAD border-bypassing E-P pairs is underestimated. The known examples, just  
40 mentioned, are among some of the longer-range acting enhancers and have preferentially been  
41 identified by low-throughput phenotype-driven studies in developmental contexts where cell  
42 culture models are often lacking. Being able to distinguish these border-crossing from border-  
43 respecting enhancers is an essential feature of understanding *cis*-regulation. A notable case of  
44 this border bypass occurs in the regulation of the gene *Pitx1*, where one of its major enhancers,  
45 *Pen*, is located no less than three TADs away (**Fig. 1a, b**).

46

47 Several properties make *Pitx1* ideal for studying border bypass. Whereas enhancer  
48 redundancy/shadow enhancers can often mask the regulatory contributions of individual  
49 enhancers and functional linking between enhancers and promoters<sup>14,15</sup>, the *Pitx1* distal  
50 enhancer, called *Pen*, has obvious effects on both gene expression and morphological

51 phenotypes. Indeed, studies in human patients first implicated the region around *Pen* in regulation  
52 of limb specific expression of *Pitx1*<sup>16,17</sup>. Subsequent work with mouse genetic models found  
53 deletion of *Pen* caused a 45% reduction in *Pitx1* hindlimb expression, and increased incidence of  
54 clubfoot, consistent with reduced *Pitx1* function<sup>18</sup>. In addition to the multi-TAD crossing *Pen*, two  
55 other hind-limb specific enhancers of *Pitx1* have also been characterized, which provide intriguing  
56 comparison cases. 5' of *Pitx1* lies the RA3/PDE enhancer, which crosses no TAD borders in  
57 interacting with *Pitx1*<sup>19</sup>. Meanwhile 3' of *Pitx1*, in the neighboring TAD, lies the *PeIB* enhancer in  
58 the intron of a neighboring unrelated gene<sup>20</sup>. This enhancer is conserved through fish, but must  
59 navigate one border to interact with *Pitx1*.

60

61 Another attractive feature of *Pitx1-Pen* border bypass is its tissue-specificity. Though *Pitx1* is  
62 primarily expressed in hindlimb and not forelimb, the isolated *Pen* enhancer drives expression in  
63 both tissues when cloned and tested in a small transgenic reporter construct<sup>18</sup>. Furthermore, the  
64 *Pen* enhancer in the native *Pitx1* locus carries the H3K27ac mark associated with active  
65 enhancers in both hindlimbs and forelimbs (**Fig. 1b**<sup>21</sup>). However, recent capture-Hi-C (cHi-C)  
66 experiments from mouse limb revealed quantifiably higher interaction frequency between *Pen*  
67 and *Pitx1* in the hindlimb compared to forelimb tissues<sup>18</sup>. Notably, this work also showed that this  
68 difference was largely reduced when genetic aberrations removed a TAD boundary between *Pen*  
69 and *Pitx1* and brought them closer in linear distance, either through deletion or inversion, which  
70 led to increased *Pen-Pitx1* interaction, ectopic *Pitx1* expression in the developing forelimb, and  
71 corresponding forelimb to hindlimb developmental transformations<sup>18</sup>. Thus, the hindlimb-specific  
72 interaction topology appears to account for the normal cell-type specific gene expression, but how  
73 this contact is achieved across multiple TAD boundaries remains a mystery. To understand the  
74 requirements for border bypass, here we compare how the same *Pitx1* chromosomal domain  
75 differs in its 3D conformations between forelimb and hindlimb, where border bypass is prohibited  
76 in the former but enabled in the latter.

77

78 We employ Optical Reconstruction of Chromatin Architecture<sup>22,23</sup> to visualize the 3D organization  
79 of the *Pitx1* chromosomal domain at single-chromatin resolution in developing limbs. This  
80 microscopy based approach, similar to other recent studies<sup>24–28</sup>, allows the 3D chromatin  
81 trajectory to be visualized from individual cells, and thus has the potential to reveal what folding  
82 behavior enables hindlimb cells to achieve cross-TAD border enhancer-promoter interaction. By  
83 comparing 3D conformation of the *Pitx1* domain in the otherwise similar tissues of hindlimb and  
84 forelimb, we aimed to uncover the molecular mechanisms which enable functional bypass of TAD  
85 borders.

86

## 87 **Results**

88 To visualize the *Pitx1* chromosomal domain, we designed Oligopaint probes tiling a 750 kb region  
89 around *Pitx1*, encompassing the downstream *PeiB* enhancer, upstream enhancers RA3/PDE and  
90 *Pen*, and an unrelated gene *Neurog1* in the distal polycomb-silenced region (**Fig. 1a**). These  
91 probes span the 2 CTCF marked TAD borders, which we term B1 and B2, respectively, between  
92 *Pitx1* and *Pen* (**Fig. 1a, b**). We hybridized these probes to developing forelimbs and hindlimbs  
93 from E11.5 - E12.5 C57BL/6J mouse embryos, and visualized nearly 100,000 chromosome traces  
94 at 10 kb resolution, with each trace containing 75 3D coordinates, across 5 individual experiments  
95 (**Supplementary Table 1**).

96

97 The pairwise contact frequency (where two positions were found in proximity i.e., within 200 nm  
98 of one another) agreed closely with the corresponding frequency at which ligated reads were  
99 detected in previous work using cHi-C (**Fig. 1d**), and revealed a similar pattern of TADs, loops  
100 and stripes (**Fig. 1a** and **Extended Data Fig. 1a**). Comparing the contact frequency maps from  
101 hindlimb and forelimb, we see that the associations of *Pitx1* with *PeiB*, *RA3*, *RA4*, and *Pen* are all  
102 more frequent in the hindlimb, where these enhancers contribute to *Pitx1* expression<sup>18–20</sup> (**Fig.**

103 **1c,f)**, consistent with previous reports <sup>18</sup>. These differences are also apparent when we examine  
104 the absolute distances instead of contact frequencies (**Extended Data Fig. 1d-f**). In contrast to  
105 these enhancer-promoter interactions, the interactions between *Pitx1* and the gene *Neurog1* are  
106 more frequent in forelimb, also consistent with previous cHi-C measurements <sup>18</sup>. Although yet to  
107 be tested, this gene-gene interaction is likely mediated by Polycomb dependent long range  
108 looping <sup>29,30</sup>, as both genes are enriched in Polycomb-associated H3K27me3 in forelimb, whereas  
109 in hindlimb, only *Neurog1* is H3K27me3 rich (**Fig. 1b**). The agreement between the two technically  
110 distinct assays testifies to the accuracy of the data. Additionally, the single-molecular nature of  
111 ORCA data allows us to robustly test the statistical significance of the difference across thousands  
112 of measurements (**Fig. 1f** and **Extended Data Fig. 1e**).

113

114 Surprisingly, while several cross-TAD interactions are more frequent in hindlimb, the TAD borders  
115 are also stronger in hindlimb compared to forelimb. For example, while *RA4* shows a higher  
116 frequency of proximity to *Pitx1* in hindlimb cells compared to forelimb cells, the TAD boundary B1  
117 (next to RA3) is stronger, and the rest of the TAD containing RA4 (though not RA4 itself) is on  
118 average farther away (**Extended Data Fig. 1d**) and experiences fewer contacts with the TAD  
119 containing *Pitx1* (**Fig. 1c**, upper dashed box and middle circle). Similarly, the TAD containing the  
120 enhancer, *Pen*, is also on average farther away from and better insulated from the TAD containing  
121 *Pitx1*, even though *Pen* and *Pitx1* are on average closer (**Extended Data Fig. 1d**) and in more  
122 frequent contact (**Fig. 1c**, lower dashed box and circle). Since the measurements are made  
123 without the need for matrix balancing to address amplification biases, are imaged on the same  
124 slide, and replicated across independent experiments (**Extended Data Fig. 2**), we interpret these  
125 data to reflect true changes in the absolute interaction and not artifacts of normalization. We thus  
126 have a paradox: stronger TAD borders, yet more frequent enhancer-promoter contacts across  
127 borders.

128

129 We hypothesized this could occur through three plausible models (**Fig. 2a**). In the first model,  
130 “Merge”, the TADs merge in a subset of chromatins, for example due to the stochastic release of  
131 boundary factors. This would allow contact between enhancer and promoter in this subset, even  
132 though at the population level the boundaries would still be detected due to the contribution of  
133 other chromatins. In the second model, “Stack”, the TADs generally remain intact, but their  
134 boundaries stack around a central hub at which the boundary-proximal enhancers and promoters  
135 meet. Finally, it is possible that enhancer and promoter interact without the TADs merging or  
136 stacking, which we call “Loop out”. For example, the promoter and enhancer could be decompact  
137 enough to leave their respective TADs and meet outside the domain. These three models, as  
138 they stipulate hypotheses about how one structural aspect influences another in the very same  
139 molecules, cannot be resolved by Hi-C or other bulk methods that are restricted to measuring  
140 average pairwise interactions. ORCA, however, with its single-chromatin resolution, is well-suited  
141 for analyzing these models.

142  
143 To compare the three models against the many individual molecules visualized with ORCA, we  
144 define criteria to determine if each chromatin trace fits Merge, Stack, or Loop Out configuration  
145 (**Fig. 2b** and **Extended Data Fig. 3**). We then analyze whether the chromatin traces fitting a  
146 particular model are more likely to have *Pitx1-Pen* contact, and whether such traces are more  
147 abundant in hindlimb versus forelimb cells. We define “Merge” chromatin traces as those having  
148 an insulation score of less than 1.1 (<10% difference in intra- vs. inter-domain median pairwise  
149 distance, after correction for linear distance) for both TAD boundaries between *Pitx1* and the *Pen*  
150 enhancer (B1 and B2 (**Fig. 1a**)), “Stack” traces as those with *Pitx1* contacting either B1 or B2,  
151 and “Loop out” traces as those not belonging to either “Merge” or “Stack”. For each model, there  
152 are numerous chromatin molecules consistent with its configuration in both forelimb and hindlimb  
153 (**Fig. 2c**). Notably, “Stack” is the only configuration that is more abundant in hindlimb than in  
154 forelimb. Moreover, among molecules with *Pitx1* contacting *Pen*, about 55% can be accounted

155 for by “Stack”, highest among the three models (**Fig. 2d**). In addition, the difference in fraction of  
156 *Pitx1-Pen* contacting molecules between forelimb and hindlimb is most pronounced among “Stack”  
157 molecules. When assessing the relative risk, an indicator of the probability of finding *Pitx1-Pen*  
158 contact given one of the three configurations, “Stack” again is the only one with a value > 1,  
159 indicating that chromatin traces in the “Stack” configuration are (in this case, > 2x) more likely to  
160 have *Pitx1* contacting *Pen* compared to molecules not in “Stack” configuration (**Fig. 2e**). These  
161 analyses show that “Stack” is the most plausible mechanism for hindlimb-enriched interaction  
162 between *Pitx1* and *Pen*. Noticeably, despite nearly all hindlimb cells expressing *Pitx1*, only ~10%  
163 of them exhibit a “Stack” configuration where *Pen* and *Pitx1* are in contact (**Fig. 2d**), suggesting  
164 that the hub organization in “Stack”, similar to the formation of TADs, is a dynamic conformation  
165 instead of a static structure.

166  
167 Thus, the data indicate that while all three mechanisms, “Loop out”, “Merge”, and “Stack”,  
168 contribute to the overall contact frequency observed in hindlimb, “Stack” is the primary  
169 conformation the chromosomal domain takes for *Pitx1* to bypass multiple TAD borders and make  
170 preferential contact with its distal enhancer, *Pen*. Such preferential contact was shown to be  
171 required for hindlimb specific up-regulation of *Pitx1* and avoidance of ectopic forelimb expression  
172 <sup>18</sup>. Transient boundary loss or looping out across the domain occurs, but they do not enhance the  
173 probability of E-P contact, as their relative risks < 1, nor show much difference in frequency  
174 between hindlimb and forelimb.

175  
176 The “Stack” model also helps explain another feature commonly observed in both Hi-C and ORCA  
177 data: long stripes in contact frequency maps. A stripe indicates that a genomic position has higher  
178 contact frequencies with almost all positions in the neighboring genomic region than other  
179 positions in that region have with each other. In **Fig. 1a**, for example, one of the stripes emanates  
180 from *Pitx1* and extends through almost the entire probed chromosomal domain. Hi-C analyses

181 have found similar stripe patterns throughout the genome, and in many cases the stripes also  
182 connect enhancers and promoters, prompting new efforts to understand their molecular origins  
183 and new models of enhancer - promoter communication <sup>31-34</sup>. Based on Hi-C analyses and  
184 polymer modeling, it has been proposed that stripes arise from the dynamic activity of cohesin  
185 molecules that load at an enhancer or promoter which is adjacent to a CTCF-site and reel-in the  
186 cognate enhancer/promoter through loop extrusion in the direction not blocked by CTCF <sup>31</sup>. By  
187 sliding the loading site across the intervening DNA in this fashion, a stripe arises in the population  
188 map (**Fig 3a**). The “Stack” model provides an alternative explanation for the stripes. With elements  
189 next to CTCF sites stacked together at a central hub, these elements are simultaneously closer  
190 to all other elements in the domain (out in the intervening loops) than those other elements are to  
191 one another (**Extended Data Fig. 4**). The centrally located boundary elements are thus more  
192 likely to contact any element out in the loops through stochastic fluctuations of the polymer  
193 (**Extended Data Fig. 4c**).

194

195 While both scenarios result in stripes at the populational level, they predict different behaviors at  
196 the single-molecular level. The “reeling-in” model predicts that for most molecules, *Pitx1* contacts  
197 no more than 1 position along the stripe: the stripe arises from capturing different chromatins in  
198 each step along the scan. Therefore, when examining chromatin traces where *Pitx1* contacts, for  
199 example, B1, *Pitx1* should not also be contacting the region between B2 and *Pen*, and the stripe  
200 should not be observed in each individual molecule. However, as seen in **Fig. 3c**, our single-  
201 molecule data shows that stripe is not only present, but stronger for molecules where *Pitx1* is  
202 interacting with either B1 or B2. The “Stack” model explains this phenomenon well: By  
203 conditioning on *Pitx1*-intermediate boundary interaction, we enrich for molecules with hub  
204 formation, a configuration where the boundaries are closer to all intervening regions. It is worth  
205 clarifying that we are not claiming “reeling-in” does not occur. To the contrary, it is likely through  
206 “reeling-in” that multiple domain boundaries stack together to form the “Stack” organization.



207 However, examining individual molecules suggests that stripes at the populational level are not  
208 merely an aggregate of single loops. Instead, “Stack” hub organization is seen in many  
209 contributing molecules, suggesting that it is indispensable for interpreting the underlying dynamics  
210 of these stripes. We observed similar aggregates of loop hubs in individual traces producing  
211 stripes in the population maps for the *SOX9* locus in human cranial neural crest cells, though in  
212 that case the stripes did not extend beyond TAD boundaries <sup>35</sup>.

213

214 We next asked, what molecular mechanisms facilitate the formation of the “Stack” conformation,  
215 and what molecular conditions differ between hindlimb and forelimb to bring this about in a tissue-  
216 specific manner? To answer these mechanistic questions, we turned to physical polymer  
217 modeling. Using the polymer modeling framework from open2c <sup>36</sup>, derived from prior work  
218 modeling loop-extrusion dynamics in chromatin <sup>37,38</sup>, we simulate the dynamics of a chromosomal  
219 domain with 4 extrusion blockers, representing *Pitx1* (promoter), B1, B2 and *Pen* (enhancer),  
220 respectively, each of which correspond to TAD-borders marked by CTCF (**Fig. 1a**). We use these  
221 simulations to explore interactions among sequentially arrayed border elements under distinct  
222 regimes of loop extrusion.

223

224 In our simulation, increasing CTCF occupancy by modeling not only moderately strengthened the  
225 TAD boundaries as expected, it also strengthened the cross-TAD contact frequency between the  
226 *Pen* enhancer and the *Pitx1* promoter (**Fig. 4e**). Examination of polymer structures with E-P  
227 contact showed frequent involvement of the intervening boundaries B1 and B2, consistent with  
228 the “Stack” organization seen for the *Pitx1* domain. Plotting the positions of the cohesin molecules  
229 reveals the presence of multi-cohesin bridges connecting the promoter to B1 to B2 to the  
230 enhancer (**Fig. 4a**). Although not all E-P contacts involved the intermediate boundary interactions,  
231 indicating that sometimes “Merge” or “Loop out” rather than “Stack” allows contact, “Stack”  
232 configuration accounts for most of the increase in contact upon increased CTCF occupancy (**Fig.**

233 **4f,g**). Similarly, the relative risk for observing E-P contact given interaction with intermediate  
234 boundaries is significantly greater than 1, whereas the relative risk given either “Merge” or “Loop  
235 out” configurations is not (**Fig. 4h**).

236

237 To explore this effect more generally, we do not insist on matching the specific organization of  
238 the *Pitx1* region with respect to the distances between border elements, their relative orientation  
239 or strengths. However, additional simulations, in which we manually tuned these parameters to  
240 give a more *Pitx1*-like structure to that observed experimentally (Pearson’s R=0.93), recapitulated  
241 the effect of boundary strengthening in increasing boundary bypass (**Extended Data Fig. 5**).

242

243 As a test of this hypothesis, we examined the binding of CTCF across the *Pitx1* domain in hindlimb  
244 vs. forelimb in published ChIP-seq data <sup>21</sup>. Interestingly, CTCF peak heights were higher at *Pitx1*,  
245 B1, B2 and B3 in hindlimb than forelimb, even though background binding levels between the  
246 peaks were similar (**Fig. 4i**). This suggests that differences in CTCF binding to peak regions could  
247 explain the distinct structural organization of the *Pitx1* domain in hindlimbs, which allows sufficient  
248 interaction for activation by *Pen* specifically in hindlimb.

249

250 To see if the Stack model applies more broadly outside of the *Pitx1* domain, we explore published  
251 datasets to examine the relationship between enhancer-promoter (E-P) pairs and TAD  
252 boundaries. If the Stack organization is a major mechanism for border-crossing interactions, we  
253 would expect that cross-TAD interacting *cis*-elements are more likely to be closer to boundaries  
254 than intra-TAD interacting *cis*-elements, whose adjacency to boundary matter less since there are  
255 no borders to cross. For E-P pairs, we take advantage of the Transcribed Enhancer Atlas from  
256 the FANTOM 5 project, where enhancer-promoter pairs were mapped using the correlation of  
257 mRNA and eRNA transcription in capped analysis of gene expression (CAGE) results across  
258 diverse human cell types <sup>39</sup>. For boundary calling, we use the Hi-C data obtained from GM12878

259 cell line <sup>40</sup> (**Fig. 5a**). We deliberately choose these datasets despite the lack of recency. Rao *et*  
260 *al.* remain one of the highest-resolved human Hi-C maps and demonstrated a high degree of  
261 conservation of boundaries across cell types. The FANTOM 5 E-P pairs were determined in a  
262 TAD-agnostic way and a substantial number of them were > 100 kb apart. Most more recent E-P  
263 prediction datasets took TAD boundaries into consideration and/or uncovered relatively few E-P  
264 pairs >100 kb apart, possibly due to limitations of cell-type choice and assay sensitivity <sup>41,42</sup>,  
265 rendering them inappropriate for our purpose.

266

267 We focus on long-range E-P interactions (>100 kb, ~60% of the 1e5 E-P pairs in the dataset),  
268 and intersect these with TAD border calls from Hi-C. We find many of these long-range  
269 interactions cross a TAD border. To see if border-stacking could play a role in a substantial  
270 fraction of these cross-border interactions, we compute the largest distance to the nearest border  
271 for both E and P in boundary-crossing pairs and for non-boundary-crossing pairs. We find  
272 crossing pairs are significantly more likely to be near a border ( $p=2e-308$ , Mann-Whitney U and  
273 KS-test) than non-crossing pairs, with a median distance of 40 kb from the nearest border for both  
274 E and P, rather than over 100 kb (**Fig. 5b**). This statistical trend is consistent with border stacking  
275 facilitating border bypass for a substantial number of E-P interactions across the human genome.

276

277

## 278 **Discussion**

279

280 Here we set out to understand the physical and molecular mechanisms which allow some  
281 enhancers to regulate genes across TAD boundaries. Combining imaging and molecular dynamic  
282 modeling, we arrived at a model in which strengthening the loop-extrusion-blocking behavior of  
283 border elements increases the probability that they will be collected together at a central hub by  
284 arresting consecutive cohesin-mediated loops. Enhancers and promoters proximal to these

285 borders thus also gather at the hub, where they interact with elevated frequency, whereas  
286 enhancers and promoters more distal from the border are neither intermeshed by extrusion nor  
287 collected at hubs. This model provides a mechanistic explanation of why some enhancers can  
288 act across TAD borders more easily than others, and a predictive basis on which to identify  
289 border-crossing enhancer candidates.

290

291 The picture of the Stack organization (e.g. **Fig. 5c**) has a superficial resemblance to earlier models  
292 of multi-enhancer-gene hubs, sometimes described as rosettes <sup>43</sup>. Notable examples include  
293 interactions between the protocadherin alpha genes <sup>44</sup>, the *Tcr* locus in thymocytes <sup>45</sup> and  
294 enhancer “archipelagos” near the *Hoxd* genes <sup>46</sup>. However, they differ from the organization  
295 proposed here both in the molecular evidence supporting the model and in the way the structure  
296 was interpreted for gene expression. Rosette structures were proposed on the basis of 3C (and  
297 in some cases later 4C experiments), which showed preferential ligations among the genes and  
298 enhancers. As these methods measure only pairwise interaction, the proposed multi-way hub  
299 organization is by nature speculative. Entirely distinct conclusions were drawn from the inferred  
300 structure as well. The cell-type specific nature of enhancer-promoter interaction was emphasized,  
301 but no question of border and border bypass existed for these loci, nor was any speculation of  
302 boundary effects a component of the models. As Hi-C increasingly displaced 3C approaches and  
303 provided more ways to correct for the accessibility bias at enhancers and promoters <sup>47</sup>, the  
304 enhancer rosette model at these loci has given way to a TAD interpretation <sup>48–50</sup>. In investigating  
305 how a key developmental enhancer might bypass these TAD borders, we have presented direct  
306 data for specific multi-way interactions. Rather than functioning as enhancer hubs, these multiway  
307 interactions allow a 3D geometry that preserves boundary function for border-distal elements  
308 while enabling boundary-bypass for border-proximal elements.

309

310 In our model, the cell-type specific activation of *Pitx1* gene by the distant *Pen*-enhancer can be  
311 explained by the strengthening of extrusion blocking borders in hindlimb relative to forelimb.  
312 Experimental data indicates that one of the most notable increases in CTCF border binding occurs  
313 at the *Pitx1* promoter itself, with a corresponding increase in Rad21 detection (**Fig. 1b & Fig. 4i**).  
314 The strengthening of CTCF binding, especially near the *Pitx1* promoter, increases the frequency  
315 with which *Pitx1* joins enhancers at the hub. Such differential CTCF binding could be achieved  
316 through several different mechanisms. A simple hypothesis that developing hindlimb cells express  
317 more CTCF finds no support in published data surveyed so far, including results from mice <sup>21</sup>, bat  
318 <sup>51</sup> and chicken <sup>52</sup>. Other more probable hypotheses include tissue-specific expression of cofactors  
319 that either recruit CTCF to the *Pitx1* locus or open up binding sites for CTCF. Interference of  
320 CTCF binding through DNA methylation of CTCF binding sites could also play an important  
321 regulatory role <sup>53,54</sup>. Although we are not aware of any methylomic dataset regarding forelimbs  
322 and hindlimbs of tetrapods, a previous study showed differential methylation of a transgene along  
323 the anterior-posterior axis in developing mouse embryos <sup>55</sup>. Specifically, methylation level is  
324 higher in the forelimbs compared to hindlimbs, resulting in lower expression of the transgene in  
325 the forelimbs. If the methylation difference is in the same direction at the *Pitx1* locus, it would help  
326 explain the forelimb-hindlimb differences in CTCF ChIP-seq binding, chromatin conformation, and  
327 *Pen-Pitx1* contact frequency.

328  
329 Our model provides an explanation for some other long-standing puzzles in developmental *cis*-  
330 regulation. From flies to mammals, genes in the Hox family are controlled by distal enhancers  
331 which act across CTCF-marked TAD boundaries <sup>10,22,56-62</sup>. The *Hoxd* genes are regulated in the  
332 vertebrate limb by a series of enhancer “islands” scattered throughout the 1 Mb upstream region  
333 <sup>46,50</sup>. Many of these islands, as well as the genes they regulate, are closely linked to CTCF borders  
334 <sup>13</sup>. Similarly in human hematopoietic stem cells, enhancers of anterior *Hoxa* genes, located 1.3  
335 Mb apart from their promoters and separated by TAD borders, are themselves juxtaposed to a

336 strong TAD border <sup>11,63</sup>. In *Drosophila*, the promoter of the Hox gene *Abd-B* sits near a boundary  
337 and communicates across intervening borders to its distal enhancers *iab-7* and *iab-5* <sup>10</sup>, as does  
338 the Hox gene *Scr*, whose enhancers also bypass the intervening gene *ftz* <sup>62</sup>. Several of these  
339 boundaries (a.k.a. insulators) not only coincide with TAD borders but have been shown to  
340 functionally block enhancer-promoter communication in a transgene context and prevent ectopic  
341 activation at native loci. Leading geneticists termed this cross-border regulation puzzle “the  
342 boundary paradox” <sup>10</sup>. Our model predicts that these borders, rather than inhibit or attenuate,  
343 actually facilitate action of the distal enhancers through the preferential stacking of the borders  
344 themselves. These examples of border-crossing, boundary-associated enhancers of a few major  
345 developmental control genes, along with our genome-wide analysis on the relationship between  
346 tens of thousands of inferred E-P pairs and their distances to TAD boundaries, suggest that the  
347 border stacking model proposed from *Pitx1* could be informative more generally. Such generality  
348 provides a new perspective on the contexts in which insulators will be most and least effective.  
349 Adding an insulator between an enhancer and a promoter already anchored by CTCF boundaries  
350 may have more subtle effects on contact interactions than when either the enhancer, promoter or  
351 both are not closely associated with TAD borders. This may contribute to the surprising recent  
352 findings that a variety of previously characterized insulators provide little attenuation between  
353 *Sox2* and its distal *SCR* enhancer <sup>64,65</sup>.

354  
355 Domain boundaries and the process of loop extrusion have long been two of the fundamental  
356 concepts by which we contemplate the dynamics of chromatin organization. Despite their billing  
357 as features of “3D genome organization”, TADs and their boundaries are often thought-of primarily  
358 in a quasi-1D manner. In the past, boundaries were regarded as barriers to genomic cross talk:  
359 elements only interact with other elements in the same TAD, and each TAD functioned  
360 independently from each other (**Fig. 5c**, top panel). In this view the case of *Pen* and other border  
361 crossing elements appear to be unexplained exceptions. Our 3D image data adds an additional

362 dimension to this quasi-1D model. While multiple borders cluster together in the Stack  
363 organization, border-proximal enhancers and promoters are brought into proximity, even if  
364 separated by multiple TADs. Meanwhile, border distal regions of the TAD extrude radially from  
365 this hub and are not intermixed, allowing the border function to persist (**Fig. 5c**). Moreover, this  
366 border stacking organization is consistent with the loop-extrusion model, as long as cohesin is  
367 sufficiently dense on chromatin for multiple cohesins to arrest at opposite sides of an intermediate  
368 border, facilitating the formation of a stack. Our model adds a new framework to help us reconcile  
369 loop extrusion and TAD borders with previously paradoxical examples of long-range *cis*-regulation,  
370 including border bypass and gene skipping behavior, bringing us a step closer to a predictive  
371 understanding of genome function.

372

### 373 **Acknowledgements**

374 This work was supported in part by a New Innovator's Award from the NIH, a Beckman Young  
375 Investigator Award, and a Packard Foundation Award (ANB); a predoctoral fellowship from the  
376 Ministry of Education of Taiwan (TH); and an HHMI Investigator position (DMK).

377

378 **Material and Methods**

379

380 **Animal procedures**

381 All animal procedures followed guidelines approved by Stanford University's Administrative  
382 Panel on Laboratory Animal Care (APLAC).

383

384 **Mouse limb bud section preparation**

385 C57Bl/6 embryos were harvested at E11.5 or E12.5. Pregnancy was timed by checking vaginal  
386 plugs and the developmental stage is confirmed by embryo morphology. The pregnant mouse  
387 was euthanized with CO<sub>2</sub> inhalation for 8 minutes followed by cervical dislocation. Limb buds were  
388 dissected in PBS and fixed in 4% PFA in PBS at 4°C for 2 hours. (Fixation reduces background  
389 signals.) Afterwards limb buds were washed in PBS at 4°C for 5 minutes 3 times and then  
390 individually oriented in OCT blocks, frozen in liquid nitrogen and preserved in -80°C. For  
391 sectioning, forelimb-bud and hindlimb-bud of the same embryo from the same side (right or left)  
392 were sectioned together. The OCT blocks were placed at -20°C for 30 minutes to equilibrate.  
393 Limb buds were sectioned from the proximal end along the proximal - distal axis and parallel to  
394 the anterior - posterior axis with 8 μm thickness. Sections of forelimb-bud and hindlimb-bud were  
395 placed on the same slide, which was coated with chromium–gelatin.

396 For additional details, please refer to “Embryo cryosectioning” (steps 69 - 75) of <sup>23</sup>. Note that for  
397 all our samples, we proceeded to probe hybridizing immediately without storing the slides in the  
398 fridge or freezer.

399

400 **ORCA experiment**

401 We closely followed the method comprehensively described in <sup>23</sup>.

402 **Probe Design**



403 We tiled the mouse *Pitx1* chromosomal domain, mm10 chr13:55,615,000-56,475,00, with 86 10-  
404 kb barcodes, each consisting of ~250 individual probes. Each probe is 80 bp long, with 20 bp  
405 complementary to fiducial probes, followed by 20 bp of barcode, and ended with 40 bp of unique  
406 target sequence. The probes were designed by the software described previously<sup>23</sup>. Note that  
407 we only report results for the first 75 barcodes, as not all experiments used all 86 barcodes, and  
408 regions beyond barcode 75 were not crucial for the main conclusions in this work. The complete  
409 sequences of probes and their genomic targets can be found on the 4DN data portal. The probe  
410 design software can be found on <https://github.com/BoettigerLab/ORCA-public>. The probe library  
411 was ordered from CustomArray (now operated by Genscript) as an oligo pool.

412

### 413 **ORCA hybridization**

414 We followed the procedure from ([Tracing DNA paths and RNA profiles in cultured cells and tissues](#)  
415 [with ORCA | Nature Protocols](#)). See “Hybridization with DNA primary probes”, steps 147 - 166.  
416 Following are details the protocol did not specify or modifications for our experiment. For most  
417 steps, the slide was placed inside a plastic petri dish with a diameter of 6 cm, with buffers added  
418 by pouring from a 50 mL tube and removed by suction. During the 37°C incubation with RNaseA  
419 (step 152), the petri dish containing the slide was placed inside a humidifying chamber (a tip box  
420 with water inside). We used a 22 x 22 mm coverslip at steps 154 and 157. At step 156, our  
421 hybridization mixture was composed of 26 µL of hybridization no. 2 plus 3 uL of 500 ng/uL primary  
422 probe (29 uL in total).

423

### 424 **Imaging system setup**

425 For the microscope setup, see<sup>22</sup>. (Also the “Microscope setup” section in Introduction of<sup>23</sup>.) All  
426 experiments were imaged on the system with the Ti2 body, which used a 1,536 x 1,536 (px) field  
427 of view. Briefly, it is composed of an IR-laser based autofocus system, a high performance 3D  
428 stage with 500 nm range piezo based z-stage (Ludl), and a custom fluidics system. Illumination

429 is provided by a 561-nm solid-state laser (MPB 2RU-VFL-P-2000-560-B1R, for fiducial probes)  
430 and a 647-nm solid-state laser (MPB 2RU-VFL-P-2000-647-B1R, for readout probes). The  
431 microscope setup is available on the Micro-Meta:  
432 [https://data.4dnucleome.org/microscope-configurations/33ea326f-a557-4457-becf-](https://data.4dnucleome.org/microscope-configurations/33ea326f-a557-4457-becf-55bc860c4bdf/)  
433 [55bc860c4bdf/](https://data.4dnucleome.org/microscope-configurations/33ea326f-a557-4457-becf-55bc860c4bdf/)).

434  
435 For the automated fluidics system setup, see the “Fluidics setup” section in Introduction of <sup>23</sup>.  
436 Briefly, a custom built robotic system with a 3-axis CNC router engraver, buffer reservoirs and  
437 hybridization wells (96-well deep well plate) on the 3-axis stage, ETFE tubing, imaging chamber  
438 (FCS2, Biopetechs), a needle, and peristaltic pump (Gilson F155006). The needle moved between  
439 buffers of hybridization wells and flowed the liquid across the sample in the imaging chamber  
440 through the tubings with the pump.

441  
442 **Imaging process**  
443 For the imaging process, see the “ORCA imaging” section in <sup>22</sup> and steps 167 - 197 of <sup>23</sup>. Briefly,  
444 we used open-source software to control and coordinate the fluidic system and the microscope.  
445 First, 2x SSC buffer was flown into the sample chamber, and fields-of-view (FOV) were selected  
446 to cover either various parts or the whole limb section. Each FOV was then photo-bleached with  
447 both 561-nm and 647-nm at maximum intensity for 1 - 3 minutes.

448  
449 For each readout barcode, we first flowed in 200–500  $\mu$ L probe solution (25% ethylene carbonate  
450 and 2x SSC containing the readout probe and oligos complementary to the previous readout  
451 probe to peel off remaining probes) and incubated for 15 mins to hybridize. Then we flowed 1 mL  
452 of wash buffer (30% formamide in 2x SSC buffer) for 2 mins, followed by washing with 1 mL of 2x  
453 SSC buffer for 2 mins. At the imaging stage, we filled the chamber with imaging buffer (0.5 mg/ml  
454 glucose oxidase, 40  $\mu$ g/ml catalase and 10% w/v glucose in 2x SSC). Each FOV was then

455 sequentially imaged with 561-nm and 647-nm in z-stacks of 100-nm steps for a total of 100 steps.  
456 After all FOVs were imaged, 2x SSC was flown and each FOV was photobleached for 3 seconds  
457 by the 647-nm laser. This process was repeated until all barcodes was imaged. Depending on  
458 the number of FOVs, each round of imaging took ~1 - 2 hours.

459

## 460 **Analysis**

461 Image processing was performed following steps 198 onward of <sup>23</sup>. For each experiment, the  
462 resultant data are the 3D coordinates of each barcode of each detected chromatin. For each  
463 detected chromatin, its 3D coordinates can be converted into a pairwise distance matrix for ease  
464 of analysis.

465

## 466 **Masking of bad hybridizations**

467 When presenting population-average level data, either contact frequencies or median pairwise  
468 distances, we mask the bad hybridizations and interpolate with adjacent values. Bad  
469 hybridizations, namely 16, 21, 26, 29, 30, 32, 33, 36, 39, 40, 44, 49, 53, 63, 65 (refer to **Fig. 1a**  
470 for their genomic positions), are determined by visual examination of the raw imaging data, where  
471 either weak signal or off-target bright dots are present. Many of these bad hybridizations are a  
472 result of some intrinsic properties of the readout probes. The same probes have yielded poor  
473 hybridization in ORCA experiments targeting completely different regions in different organisms.

474

## 475 **Normalization**

476 The average 3D physical sizes of the probed region may vary among experiments due to  
477 variations in time a particular slide spent in different reagents, as well as how individual limbs  
478 were snipped and subjected to fixation. To address this batch effect when comparing between  
479 experiments, we normalized the median of all pairwise distances between probes 1 - 68 (common  
480 to all experiments) measured in a given limb in a given experiment.

481

482 **Insulation score (categorizing “Merge” molecules)**

483 We defined the insulation score of a TAD boundary for a single molecule as the median cross-  
484 TAD pairwise distances divided by the median intra-TAD pairwise distances.

485

486 **Simulation**

487 Polymer simulations were performed with the open source polychrom software <sup>36</sup> from open2c.  
488 Codes for performing and analyzing results, including the parameters used in each condition, are  
489 available on our Github repository. Briefly, the software constructs Langevin dynamic simulations  
490 of flexible polymers moving under thermal noise with user defined energy potentials to describe  
491 the dynamics of the polymer and molecular interactions among monomers, including the links  
492 produced by loop extrusion factors. The simulations use the freely distributed openMM framework  
493 <sup>66</sup> to provide GPU accelerated computation. For the generalized simulations in **Fig. 4**, the CTCF  
494 loading rates for each CTCF binding site are 0.18 and 0.7 for the low and high CTCF conditions,  
495 respectively. For the fine-tuned simulations in **Supp. Fig. 5**, the strength of each CTCF binding  
496 site is different, with the low CTCF condition having a 60% CTCF loading rate compared to that  
497 of the high CTCF condition.

498

499 **Data availability**

500 The chromosome trace data has been converted to the NIH 4DN data standard, FOF-CT (FISH-  
501 omic Format, Chromosome Tracing) and can be accessed at 4DN data portal  
502 (<https://data.4dnucleome.org/>) with accession 4DNES4TC13IL. Simulation data are available on  
503 Zenodo with the following DOIs: 10.5281/zenodo.7566077, 10.5281/zenodo.7566087,  
504 10.5281/zenodo.7566087, 10.5281/zenodo.7572059.

505

506 **Code availability**

507 Scripts for analyses and figure generation are available in our github repository:  
508 <https://github.com/BoettigerLab/ORCA-Pitx1-2022>. Polymer simulations also require the  
509 simulation toolkit adapted from the open2c project, which is available here:  
510 <https://github.com/BoettigerLab/polychrom>. Probe design and image analysis software is  
511 available at <https://github.com/BoettigerLab/ORCA-public>.

512

513

514 **Figures**

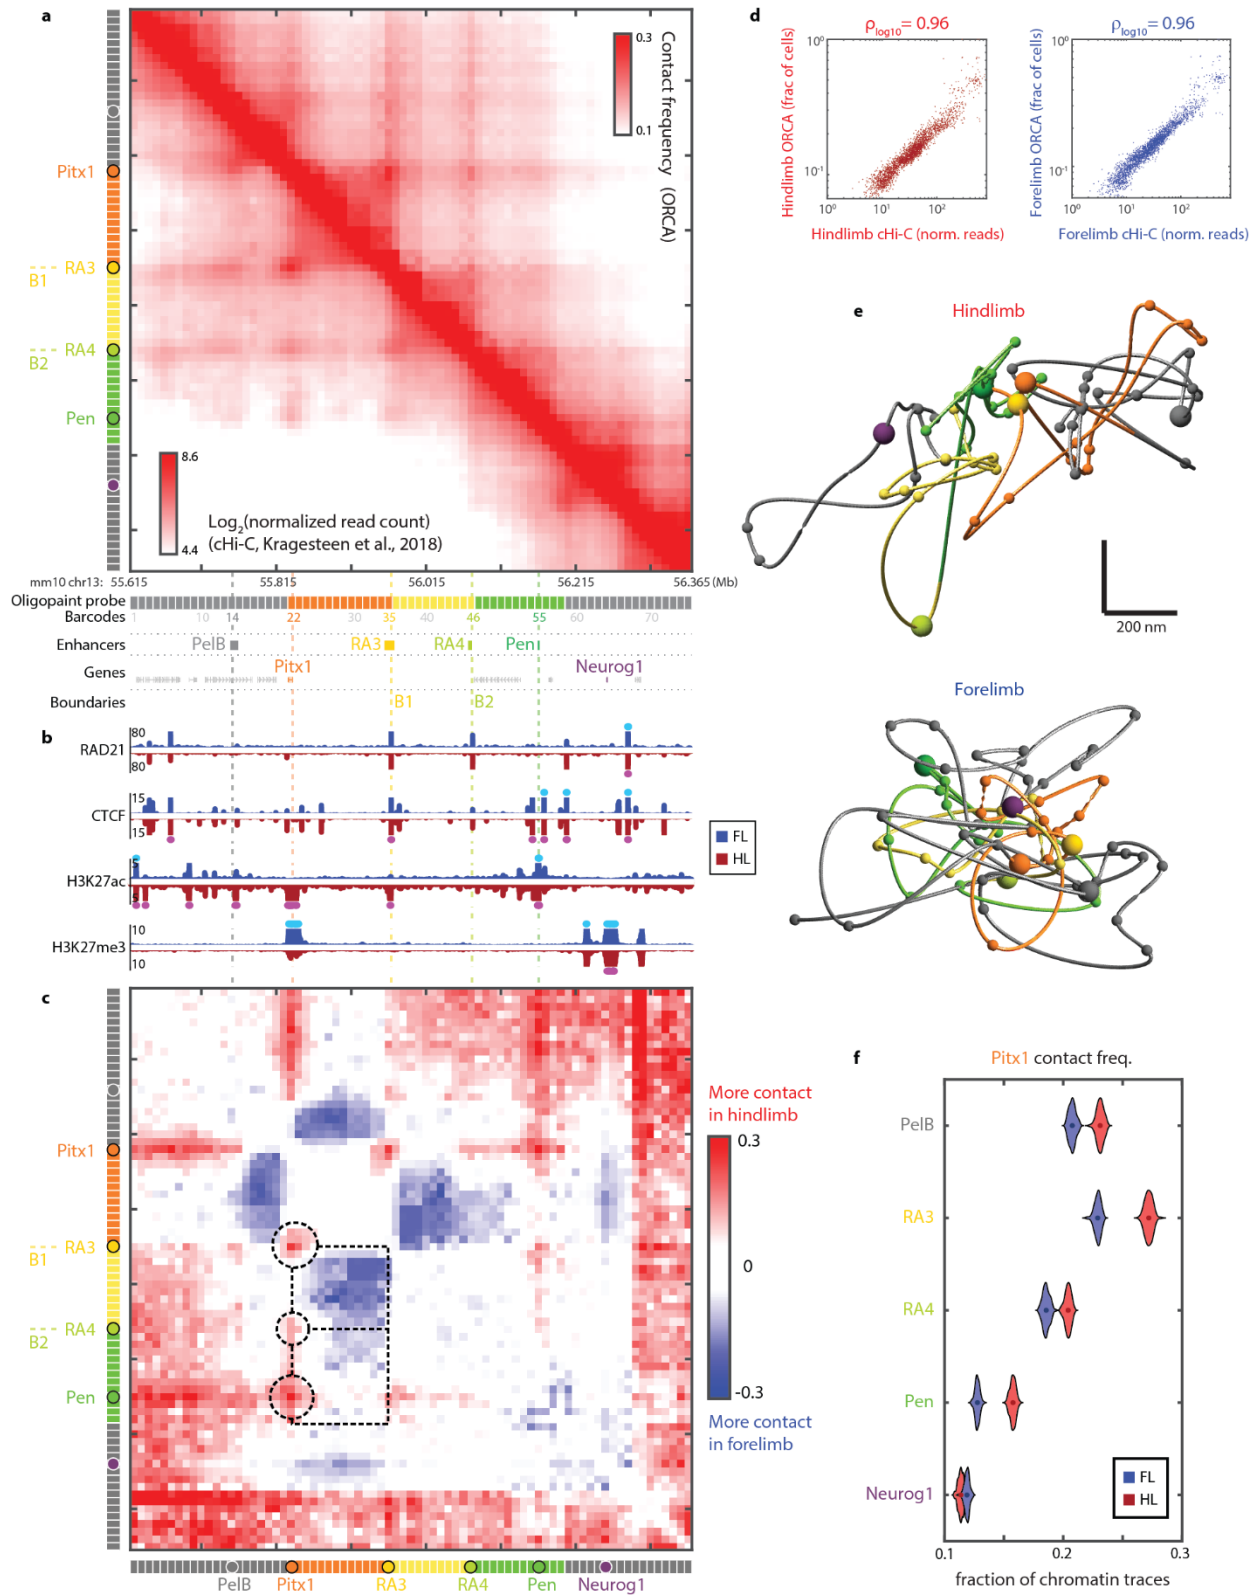

516 **Fig. 1 | Chromatin conformation at *Pitx1* domain examined by ORCA agrees with published**

517 **cHi-C data**

518 **a**, Chromatin conformation at *Pitx1* domain in hindlimb cells as detected by ORCA (upper-right half, from 44,966  
519 individual chromatin traces) and cHi-C<sup>18</sup> (lower-left half). **b**, ChIP-seq data from E10.5 limb buds (adapted from<sup>21</sup>).  
520 Blue: Forelimb data; Red: Hindlimb data. The tracks are thickened to increase visibility. Signals higher than the y-axis  
521 limit are marked with bright turquoise and magenta for FL and HL, respectively. **c**, Difference in contact frequency,  
522 shown as the log<sub>2</sub> ratio of hindlimb to forelimb. See text for discussion on the paradox highlighted by the dashed boxes  
523 and circles. **d**, Correlation of cHi-C and ORCA from hindlimb and forelimb. **e**, Representative reconstructed chromatin  
524 traces of the *Pitx1* chromosomal domain from hindlimb and forelimb visualized using ORCA. Spheres represent  
525 important genes and enhancers. See colorbar in **a** or **c** for reference. **f**, Violin plots quantifying the difference in contact  
526 between *Pitx1* promoter and the indicated elements. All comparisons are statistically significant. ( $p = 2.6e-34$ ,  $p = 2.6e-$   
527  $34$ ,  $p = 2.8e-13$ ,  $p = 2.6e-34$ ,  $p = 2.6e-34$ , Wilcoxon test.)

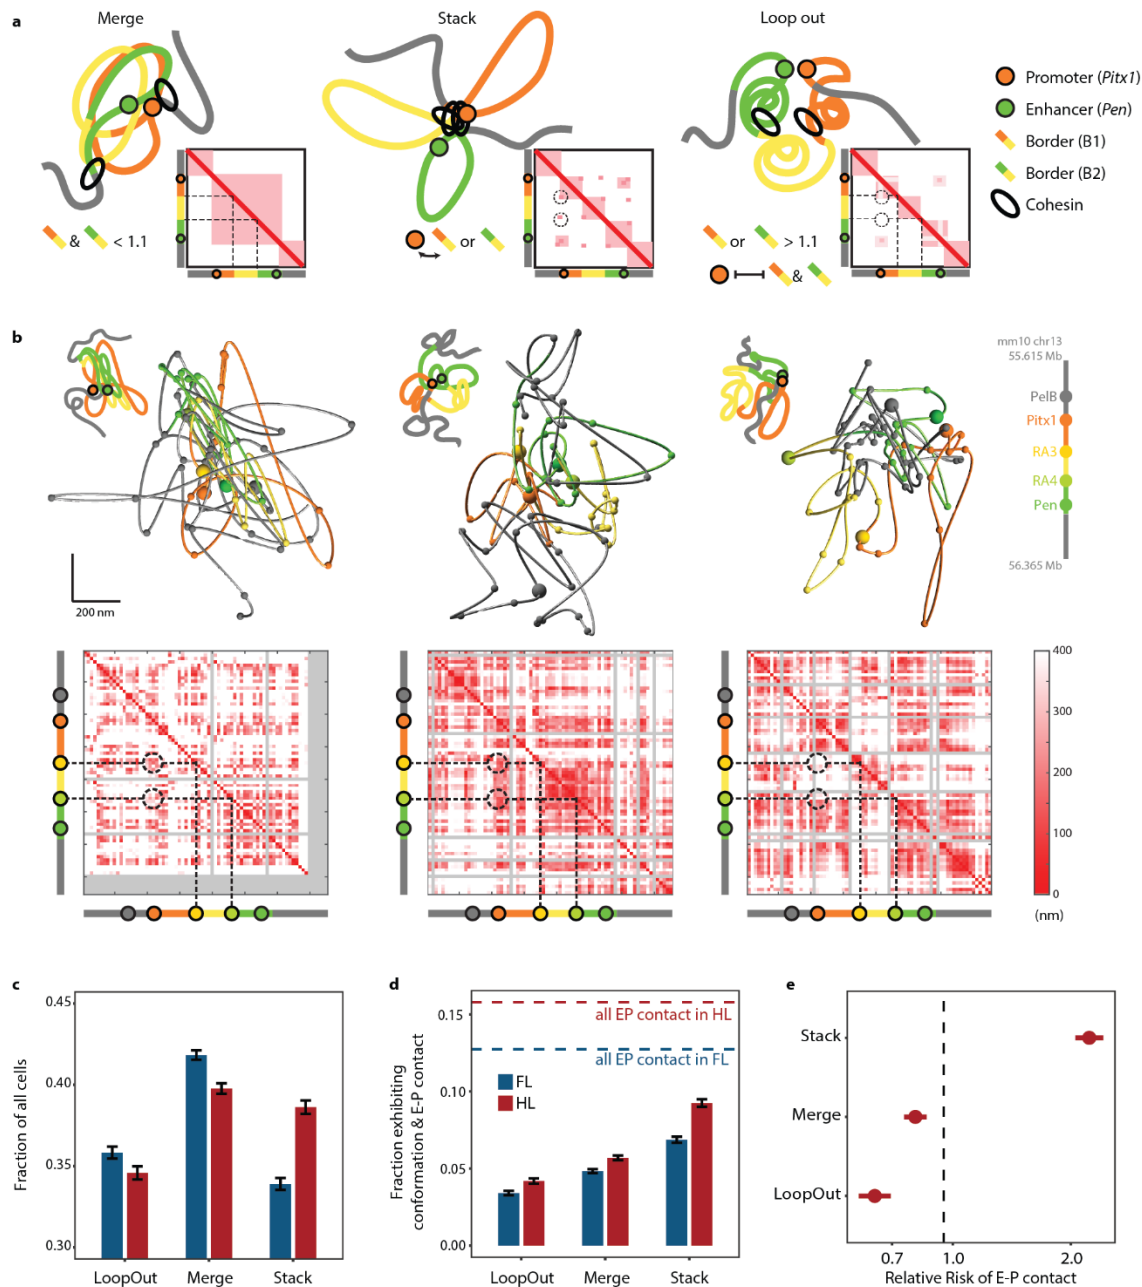

528

529 **Fig. 2 | Testing three hypotheses regarding cross boundary enhancer promoter interaction**

530 **a**, Schematic representation of the three models, each showing a cartoon chromatin trace, an idealized distance matrix

531 at lower right, and the defining criteria at lower left. “Merge” is characterized by the weakening of boundaries B1

532 (orange-yellow) and B2 (yellow-green) between the enhancer and the promoter, emphasized by the dotted lines. “Stack”

533 is characterized by promoter contacting intermediate boundaries B1 or B2, emphasized by the dotted circles. “Loop

534 out” chromatin are those that neither merge nor stack (clear boundaries along the dotted lines and no contact in the

535 dotted circles). **b**, Representative chromatin traces for each model. The top row shows reconstructed chromatin traces



536 along with simplified cartoons that highlights the positions of enhancer, promoter and boundaries. The bottom row  
537 shows single-trace distance matrices. Gray rows and columns indicate missing data. The dotted lines mark the  
538 boundaries B1 and B2. The dotted circles mark the contacts between *Pitx1* and B1 and B2. Note how the contacts are  
539 present in “Stack” but not “LoopOut”. **c**, Fraction of all molecules exhibiting configurations matching each model in  
540 forelimb (blue) and hindlimb (red). Error bars represent standard deviations. **d**, Fraction of molecules where *Pitx1-Pen*  
541 interact exhibiting configurations matching each hypothesis in forelimb (blue) and hindlimb (red). Error bars represent  
542 standard deviations. Dashed lines indicate the fraction of all molecules exhibiting *Pitx1-Pen* interaction. **e**, Relative risk  
543 of having *Pitx1-Pen* contact for hindlimb molecule configurations matching each model. Bar indicates 95% confidence  
544 interval. X-axis is in log scale.

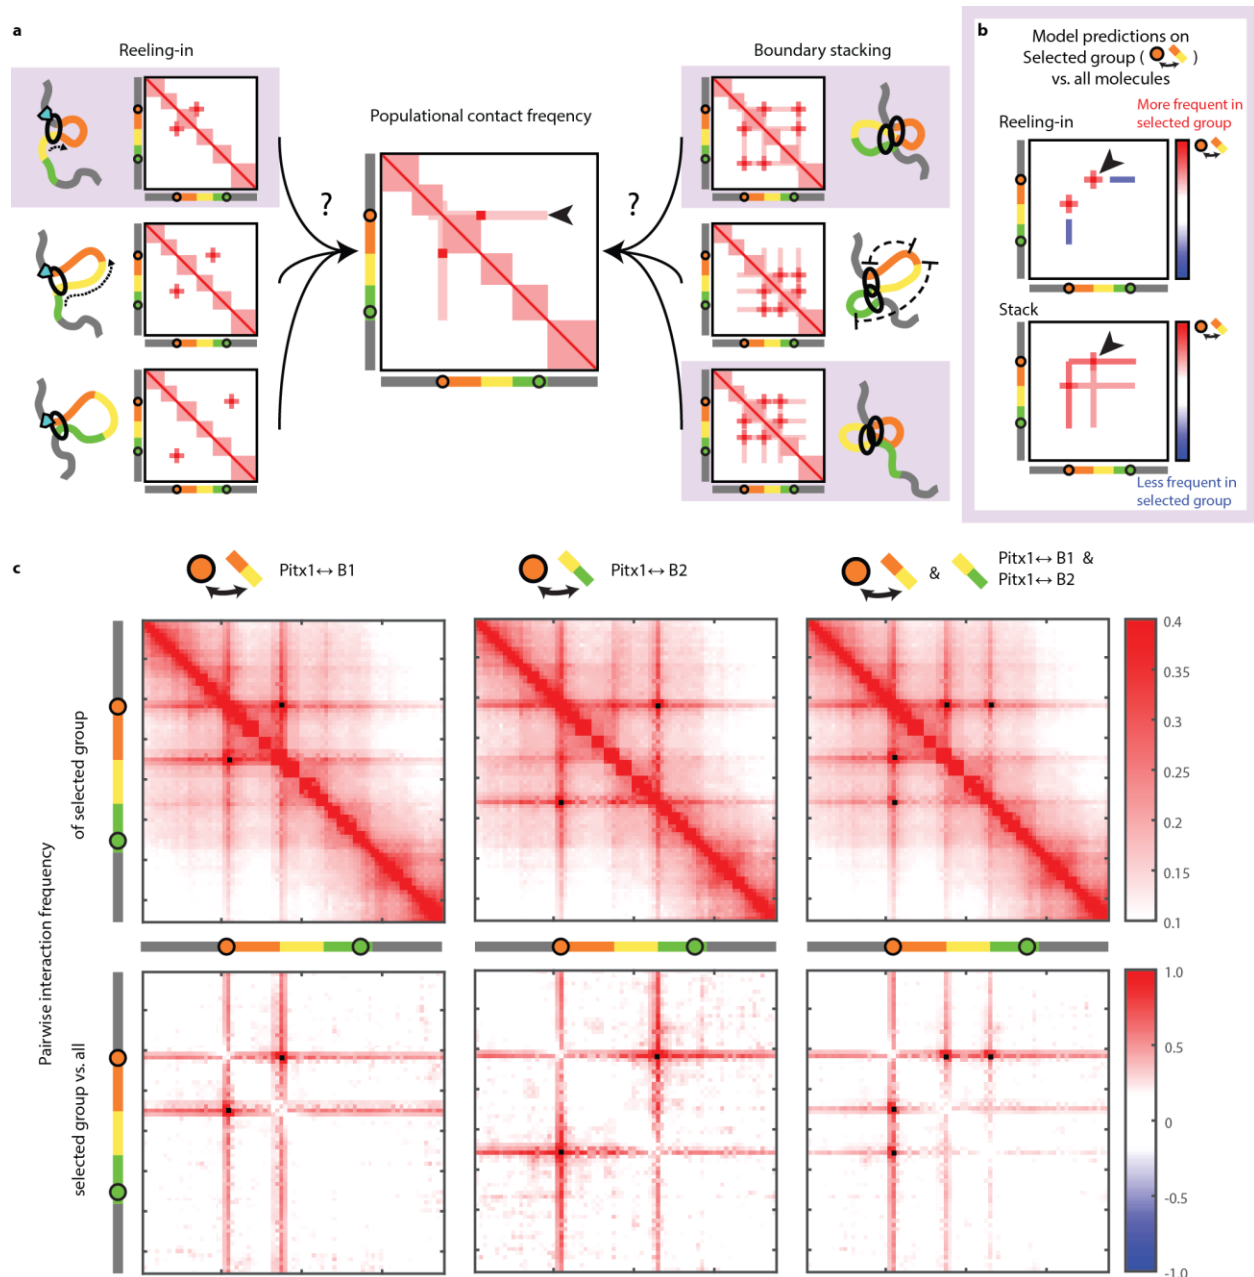

545

### 546 Fig. 3 | “Stripes” in single molecule data

547 **a**, Two models for the origin of “stripes”. (Center) Population-average pairwise contact frequency of the *Pitx1* locus in  
 548 hindlimbs shows stripe patterns (arrowhead, refer to **Fig. 1a** for actual data.) (Left) Schematic representation of how  
 549 stripes result through a “reeling-in” mechanism. The anchor at the CTCF site (cyan wedge) on the top, due to directional  
 550 loop extrusion, interacts more frequently with the colored region compared to any other positions within the same region.  
 551 Individual chromatin traces are each responsible for a dot along the stripe. (Right) Schematic representation of how  
 552 stripes result from a “Stack” hub organization. Strong CTCF sites are collected in the central hub in 3D conformation.

553 Due to its central location, the average distance from the hub to any position is shorter compared to pairwise distances  
554 between non-hub positions, as illustrated in the center-right panel. **b**, Testing the two models with single-molecule data.  
555 When comparing with all molecules, a selected group whose *Pitx1* and B1 are interacting (eg. shaded molecules in **a**)  
556 will by definition have a stronger “loop” between the said two positions, regardless of the model (arrowheads). However,  
557 “reeling-in” model predicts that other positions along the stripe would have less interaction compared to the population  
558 (blue lines), whereas “Stack” model predicts the opposite. **c**, (Top) Pairwise interaction of selected molecules on which  
559 *Pitx1* is contacting B1 (left), B2 (center) or both (right). (Bottom) Comparison of selected groups with the whole  
560 population, shown as their log2 ratio. The black pixels indicate the interactions used to select the group.

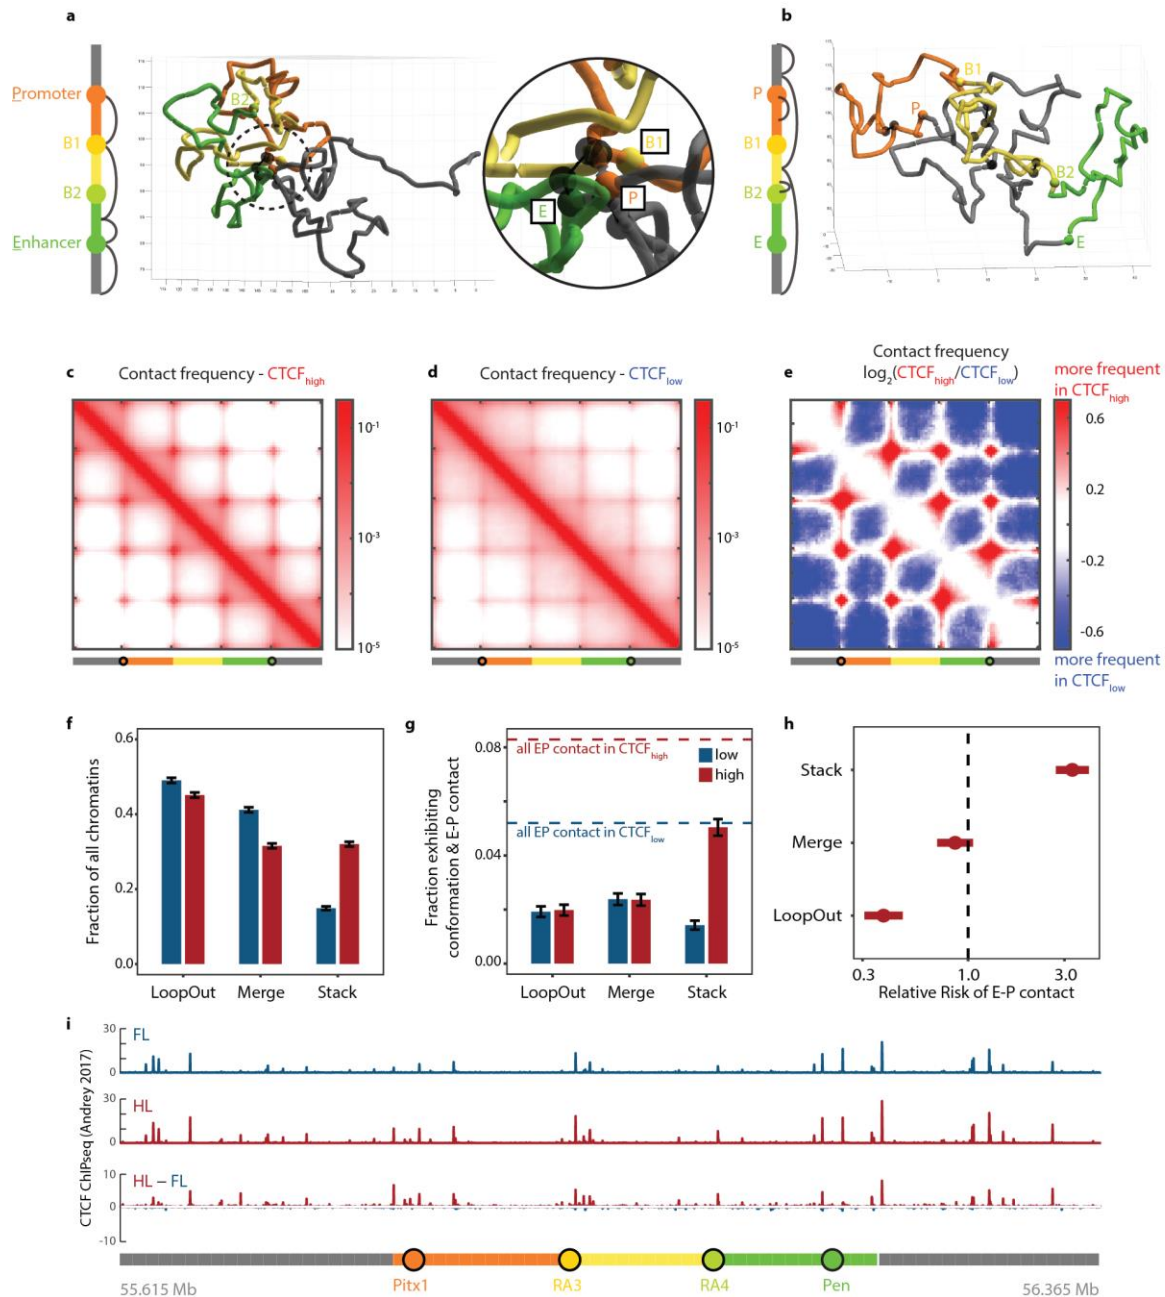

561

562 **Fig. 4 | Modeling effects of increasing CTCF activity.**

563 **a, b**, Snapshots of individual simulations. The bars on the left depict the polymer used in simulation straightened, with

564 a color scheme parallel to that used for the actual *Pitx1* chromosomal domain. The colored circles are CTCF sites.

565 Black arcs represent positions brought together by cohesin molecules in that snapshot. **a**, A polymer with high CTCF

566 binding rate and thus more cohesin (transparent black dumbbells) arrested at each CTCF site. The inset shows a

567 zoomed-in view of the circled area, where 3 CTCF sites, the promoter (P), enhancer (E) and intermediate boundary B1,

568 are brought together by arrested cohesins stalled between them in a bridge. **b**, Simulation with low CTCF concentration.

569 **c**, Contact frequency at high CTCF. **d**, Contact frequency at low CTCF. **e**, log<sub>2</sub> ratio of data in **c** and **d**. **f**, Fraction of all  
 570 simulated polymers exhibiting configurations matching each model in low CTCF (blue) and high CTCF (red) conditions.  
 571 Error bars represent standard deviations. **g**, Fraction of all simulated polymers that have E-P interaction exhibiting  
 572 configurations matching each model in low CTCF (blue) and high CTCF (red) conditions. Error bars represent standard  
 573 deviations. Dotted lines represent the fraction of all polymers exhibiting E-P interaction. **h**, Relative risk of having E-P  
 574 contact for polymers under high CTCF condition while exhibiting configurations matching a model. Bar indicates 95%  
 575 confidence interval. **i**, Comparison of CTCF ChIP-seq peak heights<sup>21</sup> in hindlimb (red) vs. forelimb (blue) at E10.5.

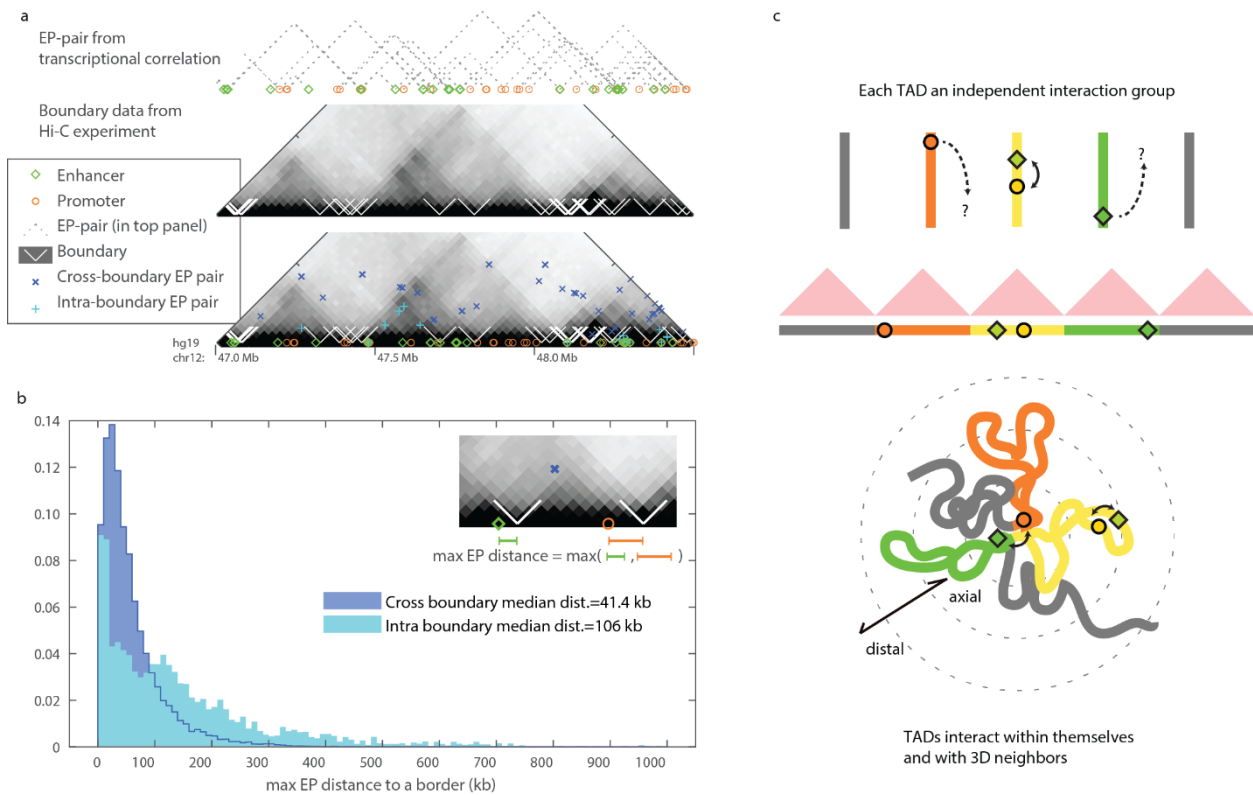

576

577 **Fig. 5 | Genome-wide analysis of cross-TAD enhancer-promoter interactions.**

578 **a, b, Boundary-proximity is enriched for E-P pairs that interact across boundaries.** **a**, Combining information of  
 579 E-P pairs across the genome<sup>39</sup> and boundary information from Hi-C data<sup>40</sup>, we categorized each E-P pair as cross-  
 580 boundary or intra-boundary. **b**, Histogram of maximum distance to a border for E-P pairs that are >100 kb apart. **c**,  
 581 **New perspective on the role of chromatin boundaries.** (Top) Conventional models consider each TAD as largely  
 582 independent and do not account for cross-TAD interactions. (Bottom) Stack model adds in the 3D relationship between  
 583 TADs and introduces the dimension of axial - distal position for each element relative to the whole molecule.

584 **Extended Data Figures**

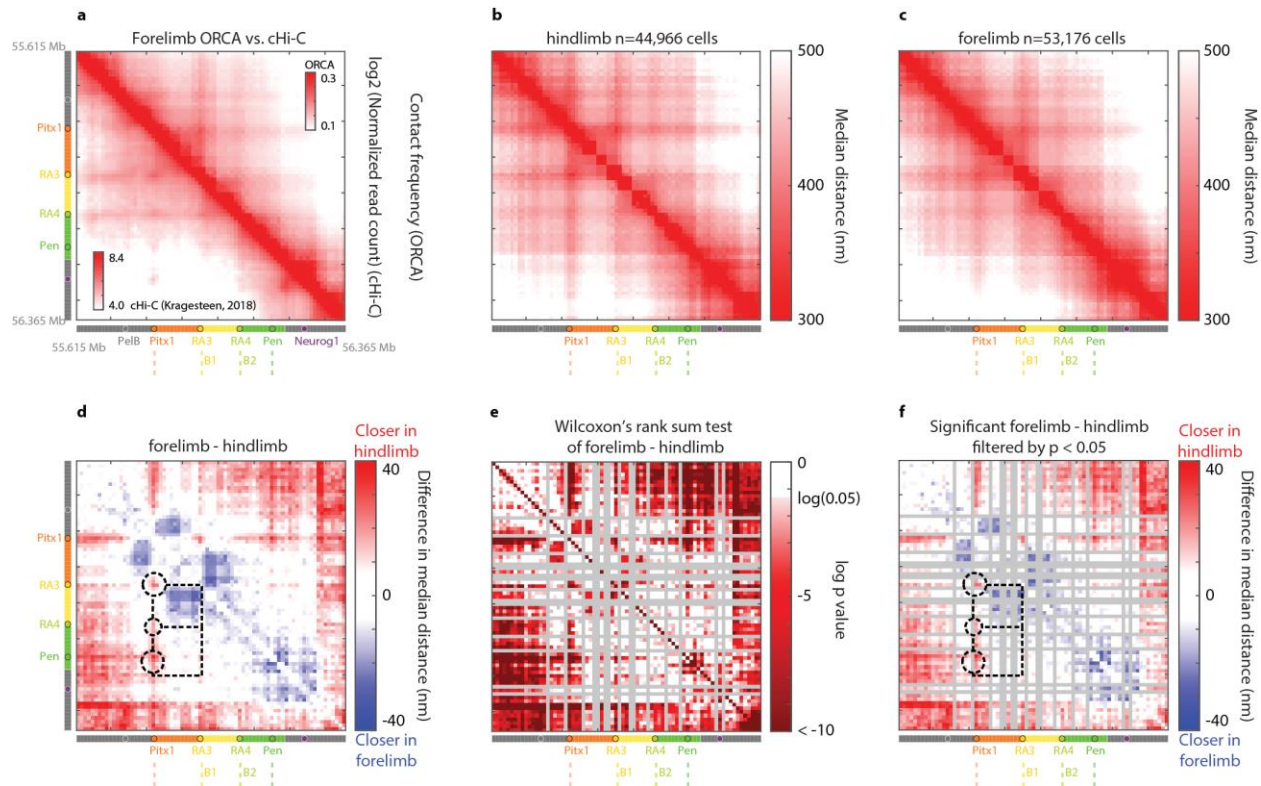

585

586 **Extended Data Fig. 1 | Forelimb contact frequency and median pairwise distance data**

587 **a**, Chromatin conformation at *Pitx1* domain in forelimb cells as detected by ORCA (upper-right half, from 53,176  
588 individual chromatin traces) and cHi-C<sup>18</sup> (lower-left half). **b**, **c**, ORCA median pairwise distance of the *Pitx1*  
589 chromosomal domain in hindlimb and forelimb cells, respectively. **d**, Difference in distance between forelimb and  
590 hindlimb cells. Red indicates that distance is smaller (closer) in hindlimb. **e**, Matrix of p-values for all distance differences  
591 shown in **d**, using Wilcoxon rank-sum test for each pairwise distance. The colorbar turns from white to pink at  $p = 0.05$ .  
592 Bad hybridizations (see Material and Methods) are masked gray. **f**, Significant (raw p-value < 0.05) distance differences.  
593 Non significant differences are masked white.



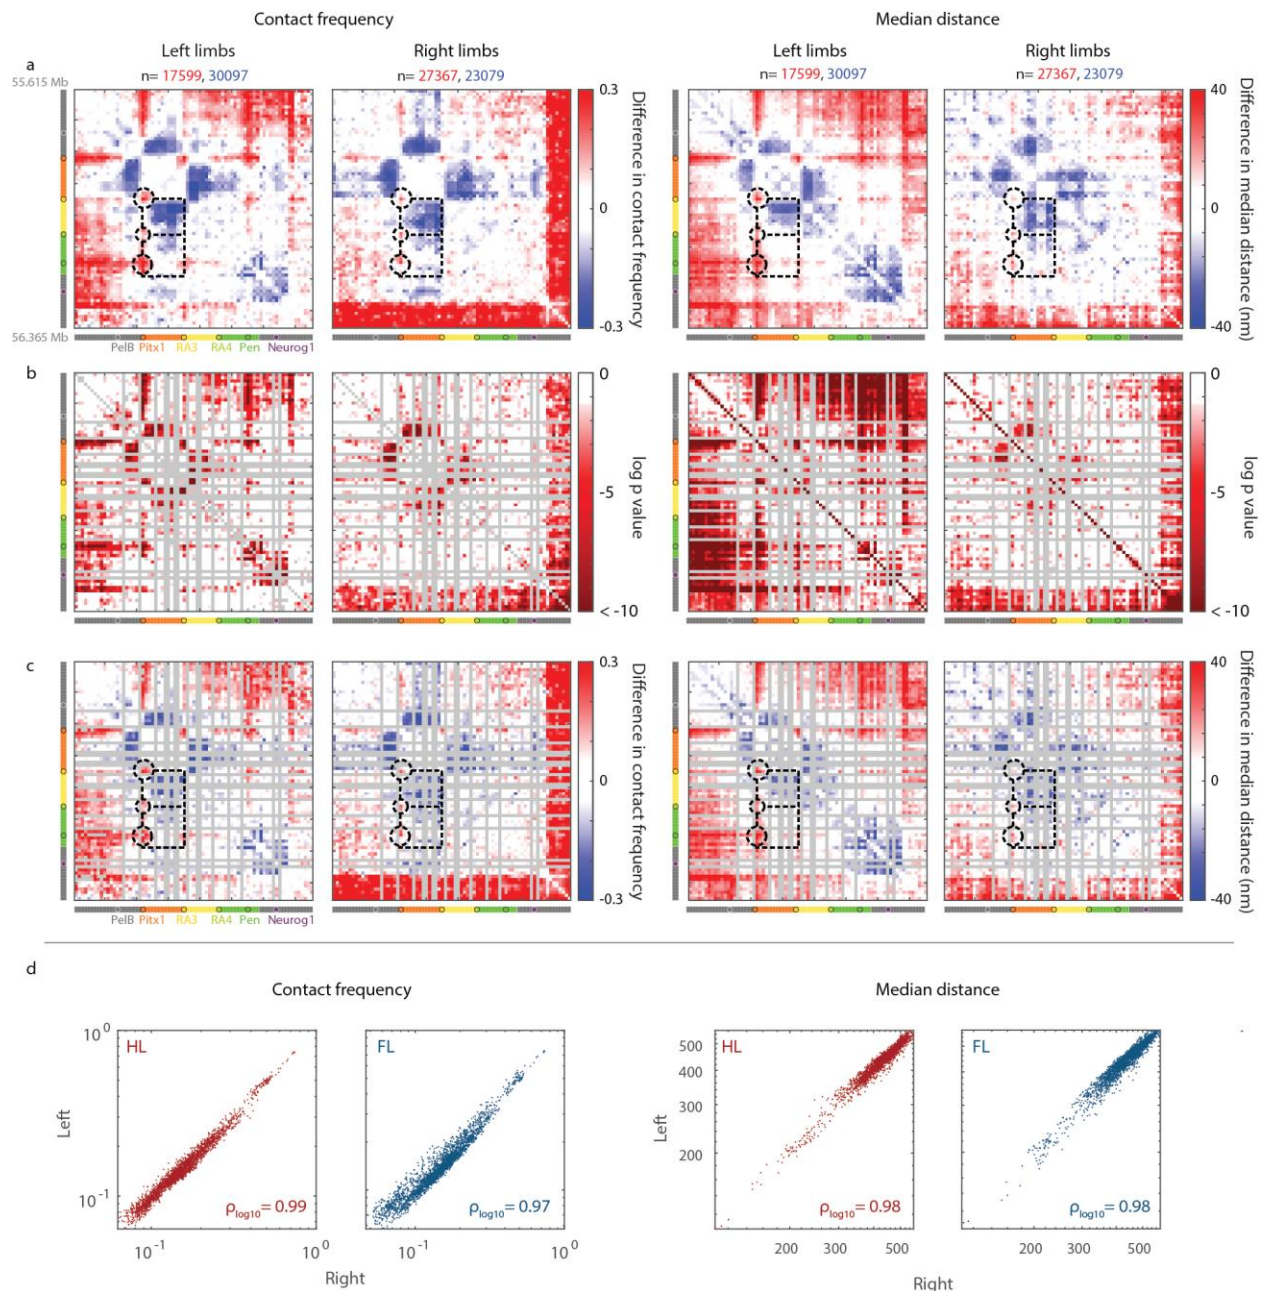

594

595 **Extended Data Fig. 2 | Concordance of results between independent ORCA experiments.**

596 The left two columns are the maps for forelimb-hindlimb differences in pairwise contact frequency from experiments  
 597 using either left limbs or right limbs and independent hybridizations. The right two columns are the maps for forelimb-  
 598 hindlimb differences in pairwise distances. The two numbers of n denote the number of chromatin traces observed for  
 599 hindlimb and forelimb, respectively. **a**, The original maps. **b**, Matrix of p-values for all differences shown in **a**, using a  
 600 chi-square test for each pairwise contact frequency and Wilcoxon rank-sum test for each pairwise distance. The  
 601 colorbar turns from white to pink at  $p = 0.05$ . Bad hybridizations are masked gray. **c**, Significant (raw p-value < 0.05)

602 differences. Non significant differences are masked white. For **a** and **c**, red indicates more contact or closer distance  
603 in hindlimb. Difference in contact frequency is shown as the log<sub>2</sub> ratio of hindlimb to forelimb. Key features discussed  
604 in this paper, highlighted by the dashed boxes and circles, are consistent between experiments from left or right limbs,  
605 such as the hindlimb-enriched contacts between *Pitx1* promoter and its enhancers and forelimb-enriched contacts  
606 between orange TAD and yellow-green TAD. The “red borders” seen in the final hybridizations (68 - 75) of the right  
607 limb is likely an experimental artifact from the end of a run. It is only seen in experiment #1, and the other right limb  
608 experiment (#5, see **Supplementary Table 1**) does not have data for these hybridizations. **d**, Correlation between left  
609 and right limb experiments for pairwise contact frequencies (left panels) and median distances (right panels).  
610



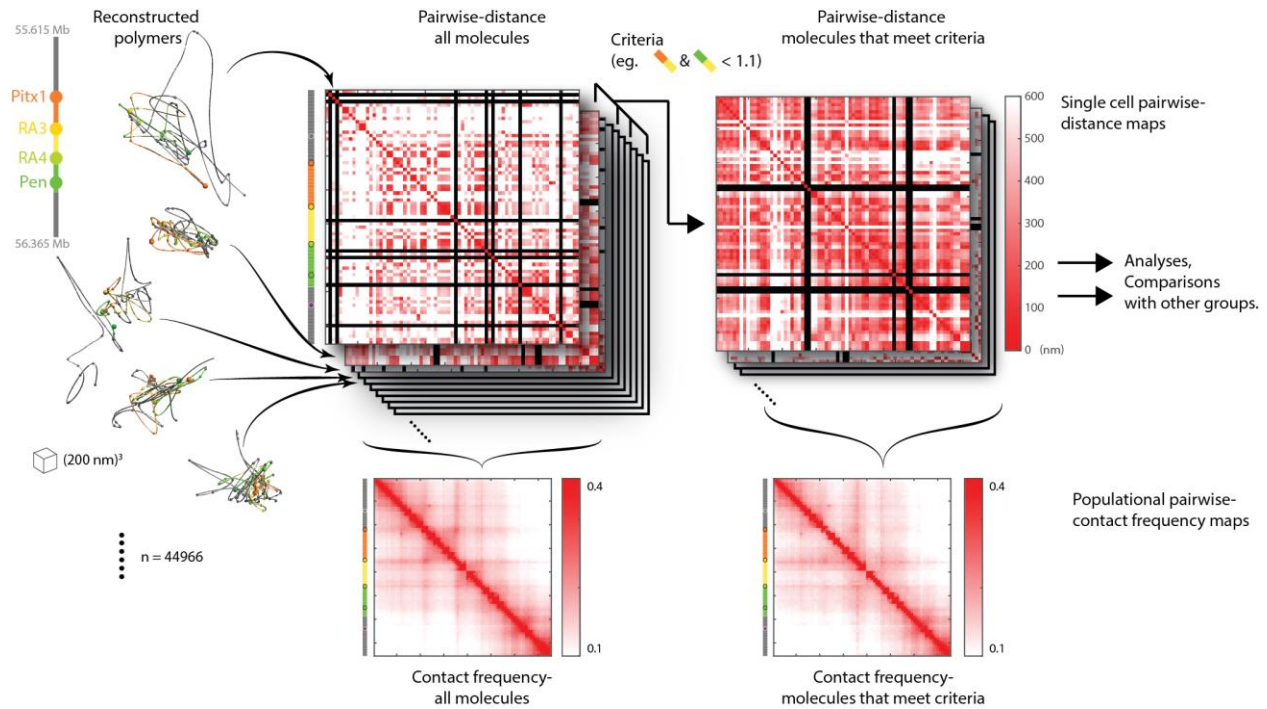

611

612 **Extended Data Fig. 3 | Selecting groups of molecules in ORCA data based on model criteria**

613 This figure illustrates how, for example, “Merge” molecules or “Stack” molecules were selected from all molecules. (Left)

614 First, the shape of individual *Pitx1* regulatory domains are reconstructed from raw ORCA data. (Center) Each molecule

615 can be represented as a pairwise-distance map. (Right) Maps that match a certain criteria (in this example, weak

616 boundary strengths on both B1 and B2) are selected into a group for further analysis. (See **Fig. 2 c-e**).

617 (Bottom) For any groups of molecules, a populational representation can be obtained using a pairwise-contact frequency map, in

618 which the value at (x, y) represents the percentage of molecules having the distance between positions x and y within

619 200 nm.

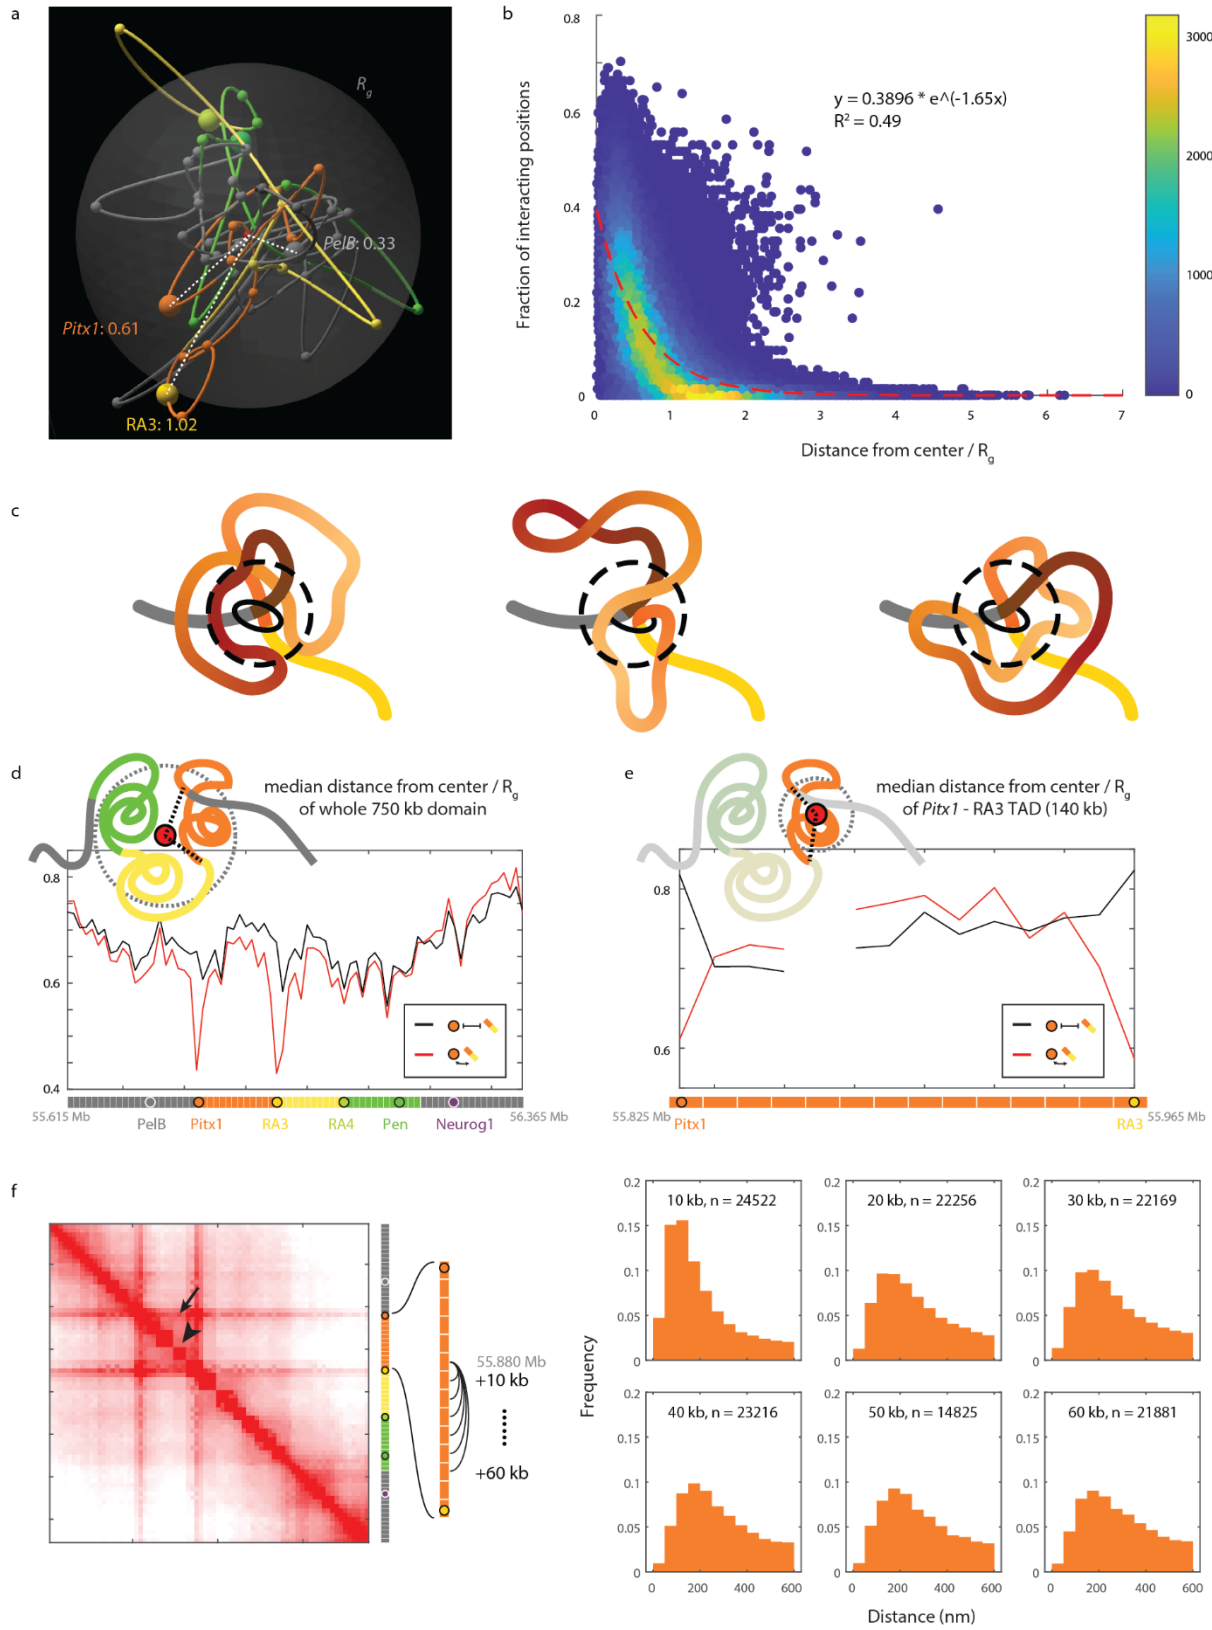

621 **Extended Data Fig. 4 | Central position within a molecule contributes significantly to**  
622 **contacting other parts of the molecule.**

623 **a**, Example chromatin trace showing how centrality is measured: for a position within the probed domain (colored  
624 spheres along the trace), we measure its distance from the center of the probed domain (small red sphere with radiating  
625 dotted white lines), normalized by the domain's radius of gyration ( $R_g$ , translucent gray globe). The centrality of *PeiB*  
626 (gray), *Pitx1* (orange) and RA3 (yellow) are shown as examples. **b**, The relationship between centrality within a  
627 molecule and contact frequency with other parts of the molecule, shown by data drawn from 641,687 10kb segments  
628 from 10,089 high-quality molecules across 5 independent experiments. Each dot represents a 10kb segment within the  
629 750 kb probed domain. The X axis denotes distance from the center. The Y axis denotes the percentage of other  
630 segments within the same molecule contacting this segment (i.e. within 200 nm). Contacting multiple other segments  
631 happens mostly when a segment is positioned centrally in the molecule. Red dash line: exponential regression of the  
632 data, with its formula and  $R^2$  value indicated. **c**, Schematics that convey how central positioning can facilitate contact  
633 with all parts of the molecule. The dotted circles denote contact distance threshold. **d**, Distance from center of each  
634 10kb segment across the *Pitx1* domain. Compared to all the molecules (black line), the subset of chromatin traces  
635 where the *Pitx1* promoter is contacting the RA3 enhancer (red line) are more likely to have both positions be at the  
636 center of the molecule. **e**, Even when considering the centrality only within the TAD between *Pitx1* and RA3, the two  
637 are still centrally positioned when they are in contact (red), despite their terminal linear positions. As illustrated by the  
638 cartoons on top of each subfigure, the differences between **d** and **e** are the choice of "center" (red) and radius of  
639 gyration (dashed gray circle). (Missing data: due to technical issues, the hybridization did not go well for the 5th data  
640 point in **e**. In other figures we interpolated for its position, but because doing so would result in a striking visual feature  
641 here, we left this segment blank). **f**, (Left) Contact frequency for molecules where *Pitx1* and RA3 are interacting, same  
642 as **Fig. 2c**. It might seem counterintuitive that being central to a region confers more contact than being linearly closer  
643 along the chromosome. (Compare the pixel marked by the arrow, representing interaction between two segments 80  
644 kb apart, and that marked by the arrowhead, representing interaction between two segments 20 kb apart). However,  
645 what seems like a few pixel's distance on the plot is actually many kilobases apart (since are regions tiled at 10 kb  
646 intervals), and within a TAD, which is not a rigid structure, the chromatin is rather flexible. (Right) Distributions of 3D  
647 distances between segment #27 (mm10, chr13: 55,875,000 - 55,885,000) and increasingly distant segments show that,  
648 despite being in the same TAD, distance distributions for segments over 30 kb apart do not differ much from each other,  
649 indicating that increased contact frequency conferred by linear proximity is limited to very proximal elements.

650

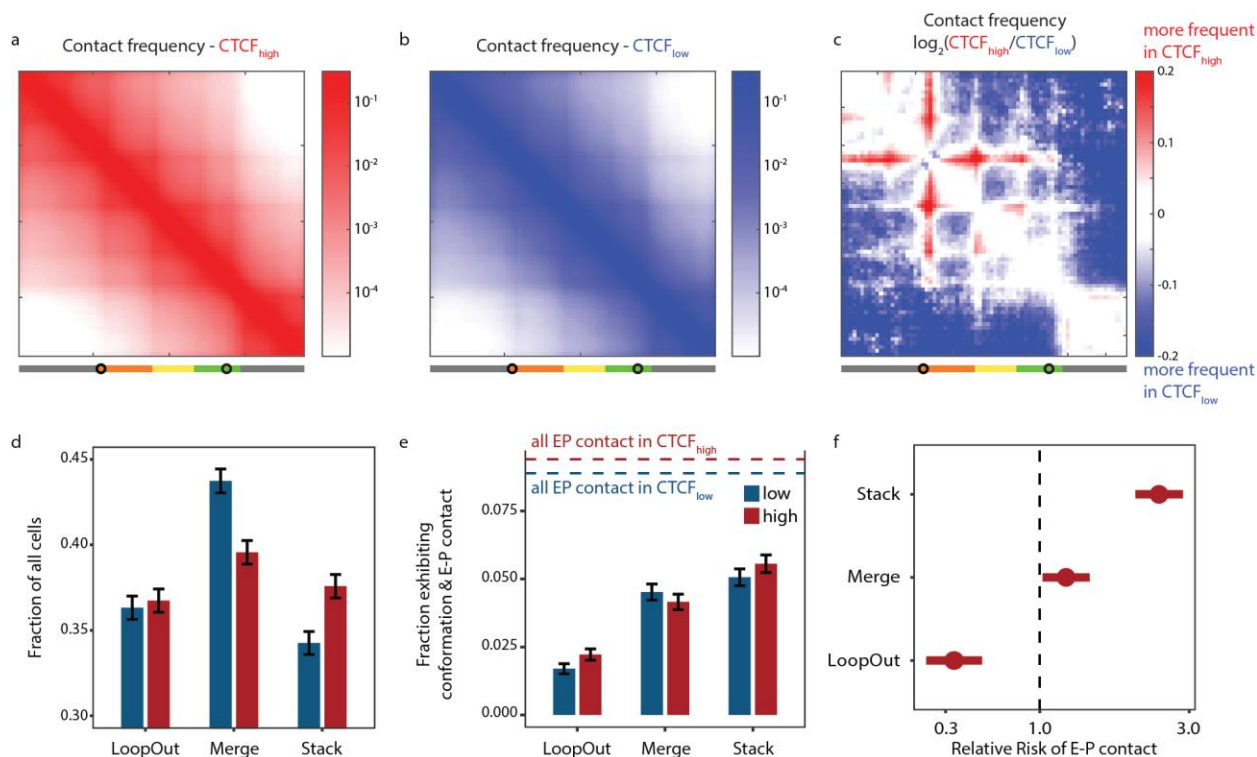

651  
652 **Extended Data Fig. 5 | Modeling effects of increasing CTCF activity with fine-tuned**  
653 **parameters.**

654 **a**, Contact frequency at high CTCF. **b**, Contact frequency at low CTCF. **c**,  $\log_2$  ratio of data in **a** and **b**. **d**, Fraction of  
655 all simulated polymers exhibiting configurations matching each model in low CTCF (blue) and high CTCF (red)  
656 conditions. Error bars represent standard deviations. Stack is the only configuration higher in the high CTCF condition.  
657 **e**, Fraction of all simulated polymers that have E-P interaction exhibiting configurations matching each model in low  
658 CTCF (blue) and high CTCF (red) conditions. Error bars represent standard deviations. Dotted lines represent the  
659 fraction of all polymers exhibiting E-P interaction. **f**, Relative risk of having E-P contact for polymers under high CTCF  
660 condition while exhibiting configurations matching a model. Bar indicates 95% confidence interval. Stack configuration  
661 grants the highest RR for EP contact. Although the RR for Merge is also positive, it is far more frequent in the low CTCF  
662 condition (see panel D).

663

664 **Supplementary Data**

665

666 **Supplementary Table. 1 | Summary of the five experiments.**

667 Experiments 2 and 3 used different sections from the same limbs. Experiments 4 and 5 used different embryos from  
668 the same litter.

669

| <b><i>Experiment#</i></b> | <b>Stage</b> | <b>Left/Right</b> | <b>Barcodes probed</b> | <b>Forelimb N</b> | <b>Hindlimb N</b> |
|---------------------------|--------------|-------------------|------------------------|-------------------|-------------------|
| 1                         | E12.5        | Right             | 1-75                   | 10087             | 11607             |
| 2*                        | E11.5        | Left              | 1-75                   | 7156              | 7326              |
| 3*                        | E11.5        | Left              | 1-70                   | 14220             | 3814              |
| 4                         | E11.5        | Left              | 1-75                   | 8721              | 6459              |
| 5                         | E11.5        | Right             | 1-67                   | 12992             | 15760             |

670

671

672 **References**

673

- 674 1. Dixon, J. R., Gorkin, D. U. & Ren, B. Chromatin Domains: The Unit of Chromosome  
675 Organization. *Mol. Cell* **62**, 668–680 (2016).
- 676 2. Dekker, J. & Mirny, L. A. The 3D Genome as Moderator of Chromosomal Communication.  
677 *Cell* **164**, 1110–1121 (2016).
- 678 3. Rowley, M. J. & Corces, V. G. Organizational principles of 3D genome architecture. *Nat.*  
679 *Rev. Genet.* **19**, 789–800 (2018).
- 680 4. Dekker, J. & Heard, E. Structural and functional diversity of Topologically Associating  
681 Domains. *FEBS Lett.* **589**, 2877–2884 (2015).
- 682 5. Ibrahim, D. M. & Mundlos, S. The role of 3D chromatin domains in gene regulation: a multi-  
683 faceted view on genome organization. *Curr. Opin. Genet. Dev.* **61**, 1–8 (2020).
- 684 6. Ibrahim, D. M. & Mundlos, S. Three-dimensional chromatin in disease: What holds us  
685 together and what drives us apart? *Curr. Opin. Cell Biol.* **64**, 1–9 (2020).
- 686 7. Cavalheiro, G. R., Pollex, T. & Furlong, E. E. To loop or not to loop: what is the role of  
687 TADs in enhancer function and gene regulation? *Curr. Opin. Genet. Dev.* **67**, 119–129  
688 (2021).
- 689 8. McCord, R. P., Kaplan, N. & Giorgetti, L. Chromosome Conformation Capture and Beyond:  
690 Toward an Integrative View of Chromosome Structure and Function. *Mol. Cell* **77**, 688–708  
691 (2020).
- 692 9. Jerkovic', I. & Cavalli, G. Understanding 3D genome organization by multidisciplinary  
693 methods. *Nat. Rev. Mol. Cell Biol.* 1–18 (2021).
- 694 10. Kyrchanova, O. *et al.* The boundary paradox in the Bithorax complex. *Mech. Dev.* **138**,  
695 122–132 (2015).
- 696 11. Wang, X. Q. D. *et al.* Three-dimensional regulation of *HOXA* cluster genes by a *cis*-element

- 697 in hematopoietic stem cell and leukemia. *bioRxiv* 2020.04.16.017533 (2020)  
698 doi:10.1101/2020.04.16.017533.
- 699 12. Beccari, L. *et al.* *Dbx2* regulation in limbs suggests interTAD sharing of enhancers. *Dev.*  
700 *Dyn.* (2021) doi:10.1002/dvdy.303.
- 701 13. Rodríguez-Carballo, E. *et al.* The *HoxD* cluster is a dynamic and resilient TAD boundary  
702 controlling the segregation of antagonistic regulatory landscapes. *Genes Dev.* **31**, 2264–  
703 2281 (2017).
- 704 14. Cannavò, E. *et al.* Shadow Enhancers Are Pervasive Features of Developmental  
705 Regulatory Networks. *Curr. Biol.* **26**, 38–51 (2016).
- 706 15. Osterwalder, M. *et al.* Enhancer redundancy provides phenotypic robustness in mammalian  
707 development. *Nature* **554**, 239–243 (2018).
- 708 16. Spielmann, M. *et al.* Homeotic arm-to-leg transformation associated with genomic  
709 rearrangements at the *PITX1* locus. *Am. J. Hum. Genet.* **91**, 629–635 (2012).
- 710 17. Al-Qattan, M. M., Al-Thunayan, A., Alabdulkareem, I. & Al Balwi, M. Liebenberg syndrome  
711 is caused by a deletion upstream to the *PITX1* gene resulting in transformation of the upper  
712 limbs to reflect lower limb characteristics. *Gene* **524**, 65–71 (2013).
- 713 18. Kragestein, B. K. *et al.* Dynamic 3D chromatin architecture contributes to enhancer  
714 specificity and limb morphogenesis. *Nat. Genet.* **50**, 463–473 (2018).
- 715 19. Sarro, R. *et al.* Disrupting the three-dimensional regulatory topology of the *Pitx1* locus  
716 results in overtly normal development. *Development* **145**, (2018).
- 717 20. Thompson, A. C. *et al.* A novel enhancer near the *Pitx1* gene influences development and  
718 evolution of pelvic appendages in vertebrates. *Elife* **7**, (2018).
- 719 21. Andrey, G. *et al.* Characterization of hundreds of regulatory landscapes in developing limbs  
720 reveals two regimes of chromatin folding. *Genome Res.* **27**, 223–233 (2017).
- 721 22. Mateo, L. J. *et al.* Visualizing DNA folding and RNA in embryos at single-cell resolution.  
722 *Nature* **568**, 49–54 (2019).



- 723 23. Mateo, L. J., Sinnott-Armstrong, N. & Boettiger, A. N. Tracing DNA paths and RNA profiles  
724 in cultured cells and tissues with ORCA. *Nat. Protoc.* **16**, 1647–1713 (2021).
- 725 24. Cardozo Gizzi, A. M. *et al.* Direct and simultaneous observation of transcription and  
726 chromosome architecture in single cells with Hi-M. *Nat. Protoc.* **15**, 840–876 (2020).
- 727 25. Cardozo Gizzi, A. M. *et al.* Microscopy-Based Chromosome Conformation Capture Enables  
728 Simultaneous Visualization of Genome Organization and Transcription in Intact Organisms.  
729 *Mol. Cell* **74**, 212–222.e5 (2019).
- 730 26. Liu, M. *et al.* Multiplexed imaging of nucleome architectures in single cells of mammalian  
731 tissue. *bioRxiv* 2019.12.20.885277 (2019) doi:10.1101/2019.12.20.885277.
- 732 27. Liu, M. *et al.* Chromatin tracing and multiplexed imaging of nucleome architectures (MINA)  
733 and RNAs in single mammalian cells and tissue. *Nat. Protoc.* **16**, 2667–2697 (2021).
- 734 28. Takei, Y. *et al.* Integrated spatial genomics reveals global architecture of single nuclei.  
735 *Nature* **590**, 344–350 (2021).
- 736 29. Cheutin, T. & Cavalli, G. The multiscale effects of polycomb mechanisms on 3D chromatin  
737 folding. *Crit. Rev. Biochem. Mol. Biol.* **54**, 399–417 (2019).
- 738 30. Rhodes, J. D. P. *et al.* Cohesin Disrupts Polycomb-Dependent Chromosome Interactions in  
739 Embryonic Stem Cells. *Cell Rep.* **30**, 820–835.e10 (2020).
- 740 31. Laura Vian, A. *et al.* The Energetics and Physiological Impact of Cohesin Extrusion. *Cell*  
741 **173**, 1–14 (2018).
- 742 32. Kraft, K. *et al.* Serial genomic inversions induce tissue-specific architectural stripes, gene  
743 misexpression and congenital malformations. *Nat. Cell Biol.* **21**, 305–310 (2019).
- 744 33. Krietenstein, N. *et al.* Ultrastructural Details of Mammalian Chromosome Architecture. *Mol.*  
745 *Cell* **78**, 554–565.e7 (2020).
- 746 34. Hsieh, T.-H. S. *et al.* Resolving the 3D Landscape of Transcription-Linked Mammalian  
747 Chromatin Folding. *Mol. Cell* **78**, 539–553.e8 (2020).
- 748 35. Chen, L.-F. *et al.* Structural elements facilitate extreme long-range gene regulation at a

- 749 human disease locus. *bioRxiv* 2022.10.20.513057 (2022) doi:10.1101/2022.10.20.513057.
- 750 36. Imakaev, M., Goloborodko, A. & Brandao, H. *polychrom: Polymer simulations of*  
751 *chromosomes and generating 'in silico' Hi-C maps*. (Github, 2019).  
752 doi:<https://zenodo.org/badge/latestdoi/178608195>.
- 753 37. Fudenberg, G. *et al.* Formation of Chromosomal Domains by Loop Extrusion. *Cell Rep.* **15**,  
754 2038–2049 (2016).
- 755 38. Nuebler, J., Fudenberg, G., Imakaev, M., Abdennur, N. & Mirny, L. A. Chromatin  
756 organization by an interplay of loop extrusion and compartmental segregation. *Proc. Natl.*  
757 *Acad. Sci. U. S. A.* **115**, E6697–E6706 (2018).
- 758 39. Andersson, R. *et al.* An atlas of active enhancers across human cell types and tissues.  
759 *Nature* **507**, 455–461 (2014).
- 760 40. Rao, S. S. P. *et al.* A 3D map of the human genome at kilobase resolution reveals  
761 principles of chromatin looping. *Cell* **159**, 1665–1680 (2014).
- 762 41. Gasperini, M. *et al.* A Genome-wide Framework for Mapping Gene Regulation via Cellular  
763 Genetic Screens. *Cell* **176**, 377–390.e19 (2019).
- 764 42. Nasser, J. *et al.* Genome-wide enhancer maps link risk variants to disease genes. *Nature*  
765 **593**, 238–243 (2021).
- 766 43. Gómez-Díaz, E. & Corces, V. G. Architectural proteins: regulators of 3D genome  
767 organization in cell fate. *Trends Cell Biol.* **24**, 703–711 (2014).
- 768 44. Guo, Y. *et al.* CTCF/cohesin-mediated DNA looping is required for protocadherin  $\alpha$   
769 promoter choice. *Proc. Natl. Acad. Sci. U. S. A.* **109**, 21081–21086 (2012).
- 770 45. Seitan, V. C. *et al.* A role for cohesin in T-cell-receptor rearrangement and thymocyte  
771 differentiation. *Nature* **476**, 467–471 (2011).
- 772 46. Montavon, T. *et al.* A Regulatory Archipelago Controls *Hox* Genes Transcription in Digits.  
773 *Cell* **147**, 1132–1145 (2011).
- 774 47. Hafner, A. & Boettiger, A. The spatial organization of transcriptional control. *Nat. Rev.*

- 775        *Genet.* **24**, 53–68 (2023).
- 776    48. Ba, Z. *et al.* CTCF orchestrates long-range cohesin-driven V(D)J recombinational scanning.  
777        *Nature* **586**, 305–310 (2020).
- 778    49. Kiefer, L. *et al.* Cohesin erases genomic-proximity biases to drive stochastic Protocadherin  
779        expression for proper neural wiring. *bioRxiv* 2022.03.09.483674 (2022)  
780        doi:10.1101/2022.03.09.483674.
- 781    50. Andrey, G. *et al.* A switch between topological domains underlies *HoxD* genes collinearity  
782        in mouse limbs. *Science* **340**, 1234167 (2013).
- 783    51. Eckalbar, W. L. *et al.* Transcriptomic and epigenomic characterization of the developing bat  
784        wing. *Nat. Genet.* **48**, 528–536 (2016).
- 785    52. Farlie, P. G. *et al.* Co-option of the cardiac transcription factor *Nkx2.5* during development  
786        of the emu wing. *Nat. Commun.* **8**, 132 (2017).
- 787    53. Hark, A. T. *et al.* CTCF mediates methylation-sensitive enhancer-blocking activity at the  
788        *H19/Igf2* locus. *Nature* **405**, 486–489 (2000).
- 789    54. Wang, H. *et al.* Widespread plasticity in CTCF occupancy linked to DNA methylation.  
790        *Genome Res.* **22**, 1680–1688 (2012).
- 791    55. Donoghue, M. J., Patton, B. L., Sanes, J. R. & Merlie, J. P. An axial gradient of transgene  
792        methylation in murine skeletal muscle: genomic imprint of rostrocaudal position.  
793        *Development* **116**, 1101–1112 (1992).
- 794    56. Berlivet, S. *et al.* Clustering of Tissue-Specific Sub-TADs Accompanies the Regulation of  
795        *HoxA* Genes in Developing Limbs. *PLoS Genet.* **9**, e1004018 (2013).
- 796    57. Narendra, V. *et al.* CTCF establishes discrete functional chromatin domains at the *Hox*  
797        clusters during differentiation. *Science* **347**, 1017–1021 (2015).
- 798    58. Narendra, V., Bulajić, M., Dekker, J., Mazzoni, E. O. & Reinberg, D. CTCF-mediated  
799        topological boundaries during development foster appropriate gene regulation. *Genes Dev.*  
800        **30**, 2657–2662 (2016).

- 801 59. Ishihara, K., Nakamoto, M. & Nakao, M. DNA methylation-independent removable insulator  
802 controls chromatin remodeling at the *HOXA* locus via retinoic acid signaling. *Hum. Mol.*  
803 *Genet.* **25**, 5383–5394 (2016).
- 804 60. Rodríguez-Carballo, E. *et al.* Chromatin topology and the timing of enhancer function at the  
805 *HoxD* locus. *Proc. Natl. Acad. Sci. U. S. A.* **117**, 31231–31241 (2020).
- 806 61. Amândio, A. R. *et al.* Sequential *in cis* mutagenesis *in vivo* reveals various functions for  
807 CTCF sites at the mouse *HoxD* cluster. *Genes Dev.* **35**, 1490–1509 (2021).
- 808 62. Batut, P. J. *et al.* Genome organization controls transcriptional dynamics during  
809 development. *Science* **375**, 566–570 (2022).
- 810 63. Neijts, R. *et al.* Polarized regulatory landscape and Wnt responsiveness underlie Hox  
811 activation in embryos. *Genes Dev.* **30**, 1937–1942 (2016).
- 812 64. Huang, H. *et al.* CTCF mediates dosage- and sequence-context-dependent transcriptional  
813 insulation by forming local chromatin domains. *Nat. Genet.* 1–11 (2021).
- 814 65. Chakraborty, S. *et al.* High affinity enhancer-promoter interactions can bypass  
815 CTCF/cohesin-mediated insulation and contribute to phenotypic robustness. *bioRxiv*  
816 2021.12.30.474562 (2022) doi:10.1101/2021.12.30.474562.
- 817 66. Eastman, P. *et al.* OpenMM 7: Rapid development of high performance algorithms for  
818 molecular dynamics. *PLoS Comput. Biol.* **13**, e1005659 (2017).

819
